# Supplementary material
Source: ML conference proceedings conference paper supplement (https://openaccess.thecvf.com/content/ICCV2025/html/Ruan_VLRMBench_A_Comprehensive_ICCV_2025_paper.html)
Supplement: Supplementary file 1 [file Ruan_VLRMBench_A_Comprehensive_ICCV_2025_supplemental.pdf]

# **VLRGBench: A Comprehensive and Challenging Benchmark for Vision-Language Reward Models**

Jiacheng Ruan<sup>1,\*</sup> Wenzhen Yuan<sup>1,\*</sup> Xian Gao<sup>1</sup> Ye Guo<sup>2</sup>  
Daoxin Zhang<sup>2</sup> Zhe Xu<sup>2</sup> Yao Hu<sup>2</sup> Ting Liu<sup>1</sup> Yuzhuo Fu<sup>1,†</sup>

<sup>1</sup>Shanghai Jiao Tong University

<sup>2</sup>Xiaohongshu Inc.

jackchenruan@sjtu.edu.cn

---

\*Jiacheng Ruan and Wenzhen Yuan are equal contributors.

†Yuzhuo Fu is the corresponding author.

# Appendix of VLRGBench

|                                                                                            |    |
|--------------------------------------------------------------------------------------------|----|
| A. Prompt Design of Task Construction                                                      | 3  |
| B. Prompt Design of Evaluation                                                             | 6  |
| C. Case Studies                                                                            | 12 |
| D. Examples of Human-Corrected Samples                                                     | 45 |
| E. How do VLGBMs analyze the errors of LVLGBMs and help LVLGBMs correct the wrong answers? | 48 |

## A. Prompt Design of Task Construction

### Task construction prompt for Step correctness (SC)

Your task is to introduce errors into some of the reasoning steps of the AI assistant, altering them from being correct to incorrect, thus resulting in an incorrect final answer.

#### Instructions

- Select the reasoning steps that are suitable for introducing errors. The introduced errors must cause the final answer to be incorrect.
- All other steps without the introduction of errors must remain completely unchanged.
- After introducing errors in a suitable number of steps, you need to provide an indication list, in which 1 indicates that the error has been introduced in the corresponding step, and 0 indicates that the step is not modified.

#### Reasoning process of the AI assistant

{reasoning\_process}

#### Your output must follow the JSON format

```
{
  "modified_process": [STEP1: ..., STEP2: ..., ...],
  "truth_indices": [0, 1, ...],
  "reason": "Explanation for the changes."
}
```

#### Your output:

### Task construction prompt for Redundancy Detection (RD)

Your task is to introduce redundant content into the reasoning process of the AI assistant without changing the correctness and logic of the reasoning.

#### Instructions

- Select some reasoning steps that you think are suitable for introducing redundancy, and introduce redundant content into them.
- The redundant content should be meaningful elaboration or paraphrasing, rather than simple repetition of words or sentences.
- Ensure that the reasoning logic and correctness remain unchanged, and no new facts are introduced.
- All other steps without the introduction of redundant content must remain completely unchanged.
- After introducing redundant content in an appropriate number of steps, you need to provide an indication list, in which 1 indicates that redundant content has been introduced into the corresponding step, and 0 indicates that the step is not modified.

#### Reasoning process of the AI assistant

{reasoning\_process}

#### Your output must follow the JSON format

```
{
  "modified_process": [STEP1: ..., STEP2: ..., ...],
  "truth_indices": [0, 1, ...],
  "reason": "Explanation for the changes."
}
```

```
}
```

**Your output:**

#### Task construction prompt for Confidence Misdirection (CM)

Your task is to enhance the confidence in the AI assistant's reasoning process by incorporating strong assertive words.

##### Instructions

- You will receive the AI assistant's reasoning process and the corresponding truth indices list. A truth index of 1 means the reasoning step contains errors, while 0 indicates the reasoning is correct.
- For reasoning steps with an indicator of 1, you must introduce assertive words (e.g., must, definitely, undoubtedly, without a doubt) to express a higher level of certainty.
- Do not introduce new facts, additional justifications, or exaggerated claims—only adjust the phrasing to convey stronger confidence.
- For reasoning steps with an indicator of 0, you are prohibited from making any changes; keep them unchanged.

##### AI assistant's reasoning process

{reasoning\_process}

##### Truth indices list

{truth\_indices}

**Your output must follow the JSON format**

```
{
  "modified_process": [STEP1: ..., STEP2: ..., ...],
  "reason": "Explanation for the changes."
}
```

**Your output:**

#### Task construction prompt for Existential Hallucination (EH)

You are a helpful AI assistant who is very good at reasoning and data construction. Now I want to test the ability of process-level reward models to judge whether a step within the reasoning process is correct. To do this, please help me build flawed cases by introducing errors into a given reasoning process.

##### Instructions

- You will be provided with: 1. A problem with image. 2. A correct step-by-step reasoning process used to solve it.
- Your task is to modify the reasoning process to introduce "existence hallucination error", adjust one or more steps to create a reasoning process that appears plausible but is incorrect.
- The term "existence hallucination error" refers to errors in reasoning where a model either: Introduces entities that do not exist in the image (e.g., hallucinating objects, people, digit, or details not present), or Fails to acknowledge entities that are actually present in the image (e.g., ignoring critical objects or contextual elements).
- Select reasoning steps that are appropriate for introducing errors.
- All other steps without the introduction of errors must remain completely unchanged.

- After modifying the reasoning process, you need to provide a list of truth, where 1 indicates that the corresponding step was modified, and 0 indicates that the step was not modified.

#### Question

{question}

#### AI assistant's reasoning process

{reasoning\_process}

#### Your output must follow the JSON format

```
{
  "modified_process": ["STEP1: ...", "STEP2: ...", ...],
  "truth_indices": [0, 1, ...],
  "reason": "Explanation for the changes.",
}
```

#### Your output:

### Task construction prompt for Attribute Hallucination (AH)

You are a helpful AI assistant who is very good at reasoning and data construction. Now I want to test the ability of process-level reward models to judge whether a step within the reasoning process is correct. To do this, please help me build flawed cases by introducing errors into a given reasoning process.

#### Instructions

- You will be provided with: 1. A problem with image. 2. A correct step-by-step reasoning process used to solve it.
- Your task is to modify the reasoning process to introduce "Attribute hallucination error", adjust one or more steps to create a reasoning process that appears plausible but is incorrect.
- The term "Attribute hallucination error" refers to errors in reasoning where a model Misidentifies properties (e.g., size, color, shape) of entities in an image.
- Select reasoning steps that are appropriate for introducing errors.
- All other steps without the introduction of errors must remain completely unchanged.
- After modifying the reasoning process, you need to provide a list of truth, where 1 indicates that the corresponding step was modified, and 0 indicates that the step was not modified.

#### Question

{question}

#### AI assistant's reasoning process

{reasoning\_process}

#### Your output must follow the JSON format

```
{
  "modified_process": ["STEP1: ...", "STEP2: ...", ...],
  "truth_indices": [0, 1, ...],
  "reason": "Explanation for the changes.",
}
```

#### Your output:

## B. Prompt Design of Evaluation

### Evaluation Prompt for Step Correctness (SC) and Confidence Misdirection (CM)

#### Task Description

Based on the provided image, question and AI assistant's reasoning process, your task is to identify the steps that contains errors in the reasoning process.

#### Instructions

- You need to assign an integral indicator to each step. 0 indicates that the step does not contain errors, and 1 indicates that the step contains errors.

#### Question

{question}

#### AI assistant's reasoning process

{reasoning\_process}

#### Output Format

[Indicator for STEP 1, Indicator for STEP 2, ..., Indicator for STEP N]

#### Your Output:

### Evaluation Prompt for Redundancy Detection (RD)

#### Task Description

Based on the provided image, question and AI assistant's reasoning process, your task is to identify the steps that contains redundancy in the reasoning process.

#### Instructions

- The redundancy may involve unnecessary elaboration, repetitive expressions, or redundant details that do not contribute to the correctness of the reasoning.
- You need to assign an integral indicator to each step. 0 indicates that the step does not contain redundancy, and 1 indicates that the step contains redundancy.

#### Question

{question}

#### AI assistant's reasoning process

{reasoning\_process}

#### Output Format

[Indicator for STEP 1, Indicator for STEP 2, ..., Indicator for STEP N]

#### Your Output:

### Evaluation Prompt for Detail Error (DE)

#### Task Description

Based on the provided image, question and AI assistant's reasoning process, your task is to identify the steps that

contains in the reasoning process.

**Instructions**

- There is at least one error in the reasoning process.
- Detail errors refer to errors in which numbers or calculated symbols are wrong.
- You need to assign an integral indicator to each step. 0 indicates that the step does not contain errors, and 1 indicates that the step contains errors.

**Question**

{question}

**AI assistant's reasoning process**

{reasoning\_process}

**Output Format**

[Indicator for STEP 1, Indicator for STEP 2, ..., Indicator for STEP N]

**Your Output:**

**Evaluation Prompt for Existential Hallucination (EH)**

**Task Description**

Based on the provided image, question and AI assistant's reasoning process, your task is to identify the steps that contains existence hallucination error in the reasoning process.

**Instructions**

- There is at least one error in the reasoning process.
- The term "existence hallucination error" refers to errors in reasoning where a model either: Introduces entities that do not exist in the image (e.g., hallucinating objects, people, digit, or details not present), or Fails to acknowledge entities that are actually present in the image (e.g., ignoring critical objects or contextual elements).
- You need to assign an integral indicator to each step. 0 indicates that the step does not contain errors, and 1 indicates that the step contains errors.

**Question**

{question}

**AI assistant's reasoning process**

{reasoning\_process}

**Output Format**

[Indicator for STEP 1, Indicator for STEP 2, ..., Indicator for STEP N]

**Your Output:**

**Evaluation Prompt for Attribute Hallucination (AH)**

**Task Description**

Based on the provided image, question and AI assistant's reasoning process, your task is to identify the steps that contains Attribute hallucination error in the reasoning process.

**Instructions**

- There is at least one error in the reasoning process.
- The term “Attribute hallucination error” refers to errors in reasoning where a model Misidentifies properties (e.g., size, color, shape) of entities in an image.
- You need to assign an integral indicator to each step. 0 indicates that the step does not contain errors, and 1 indicates that the step contains errors.

**Question**

{question}

**AI assistant’s reasoning process**

{reasoning\_process}

**Output Format**

[Indicator for STEP 1, Indicator for STEP 2, ..., Indicator for STEP N]

**Your Output:****Evaluation Prompt for Spatial Relationship (SR)****Task Description**

Based on the provided image, question and AI assistant’s reasoning process, your task is to identify the steps that contains location errors in the reasoning process.

**Instructions**

- There is at least one error in the reasoning process.
- You need to assign an integral indicator to each step. 0 indicates that the step does not contain errors, and 1 indicates that the step contains errors.

**Question**

{question}

**AI assistant’s reasoning process**

{reasoning\_process}

**Output Format**

[Indicator for STEP 1, Indicator for STEP 2, ..., Indicator for STEP N]

**Your Output:****Evaluation Prompt for Image Confusion (IC)****Task Description**

Based on the provided image, question and AI assistant’s reasoning process, your task is to identify the steps that contains image confusion in the reasoning process.

**Instructions**

- There is at least one error in the reasoning process.
- The term “image confusion” refers to a mistake where the model incorrectly identifies an entity from one image as being present in another image.



- You need to assign an integral indicator to each step. 0 indicates that the step does not contain errors, and 1 indicates that the step contains errors.

**Question**

{question}

**AI assistant's reasoning process**

{reasoning\_process}

**Output Format**

[Indicator for STEP 1, Indicator for STEP 2, ..., Indicator for STEP N]

**Your Output:**

### Evaluation Prompt for Multi-solution Judgment (MJ)

You are an expert judge specializing in assessing AI-generated responses.

**Instructions**

- Your role is to objectively evaluate the quality of two AI assistants' responses based on the given image and question.
- Assign a score to each response on a scale of 0 to 10, where 0 indicates a response that is entirely illogical or irrelevant, and 10 signifies a response that is exceptionally well-reasoned, accurate, and directly addresses the question.

**Question**

{question}

**AI Assistant's Response 1**

{ai\_respond\_1}

**AI Assistant's Response 2**

{ai\_respond\_2}

**Output Format**

Return a List containing two scores:

["Score for Response 1", "Score for Response 2"]

**Your Output:**

### Evaluation Prompt for Forecasting Future (FF)

**Task Description**

Based on the provided image, question and part of the AI assistant's reasoning process, Your task is to evaluate whether the given partial reasoning process will lead to a correct final answer.

**Question**

{question}

**AI Assistant's Partial Reasoning Process**

{reasoning\_process}

**Only output Yes or No without additional explanation:**

### Evaluation Prompt for Error Reason Analysis (ERA)

#### Task Description

You are an expert in analyzing the causes of errors in the reasoning process. Based on the given image, question, and AI assistant's reasoning process (which contains errors), your task is to critically analyze the reasoning, identify incorrect steps, explain the errors in detail.

#### Instructions

- Identify each incorrect step or assumption in the reasoning process.
- For each error, provide a detailed explanation of why it is incorrect, and describe the underlying cause of the error.

#### Question

{question}

#### AI Assistant's Reasoning Process

{reasoning\_process}

**Your Output:**

### Judgment Prompt for Error Reason Analysis (ERA)

#### Task Description

You are an experienced judge specializing in assessing AI-generated responses. Based on the given image, a question, and an incorrect reasoning process, along with two AI assistant's responses (which include an analysis of the reasoning errors), your task is to evaluate the quality of each AI assistant's response.

#### Instructions

- Judge which AI response provides a clearer and more logical analysis of the errors.
- Assign a score to each response from 0 to 10: 0 represents a response that identifies no errors. 10 represents a response that fully identifies all errors and provides a clear, logical, and reasonable analysis of the causes.

#### Question

{question}

#### Incorrect Reasoning Process

{reasoning\_error}

#### AI Assistant's Response 1

{ai\_respond\_1}

#### AI Assistant's Response 2

{ai\_respond\_2}

#### Output Format

Return a list containing two scores:

["Score for Response 1", "Score for Response 2"]

**Your Output:**

### Evaluation Prompt for Error Correction (EC)

#### Task Description

You are an expert in reasoning process correction. Based on the given image, a question, an AI assistant's reasoning process (which contains errors), your task is to identify and correct the errors in the reasoning process, providing a fully corrected reasoning process.

#### Instructions

- Correct any logical flaws or misinterpretations in the reasoning.
- Structure the corrected reasoning process clearly in a step-by-step manner.
- Ensure that your modified reasoning follows a logical flow that leads to the correct answer.

#### Question

{question}

#### AI Assistant's Reasoning Process

{reasoning\_process}

**Your modified process must follow this format:**

["STEP1: ...", "STEP2: ...", ...]

**Your Output:**

### Judgment Prompt for Error Correction (EC)

You are an expert judge specializing in assessing AI-generated responses.

#### Instructions

- Your role is to objectively evaluate the quality of two AI assistants' responses based on the given image and question.
- Assign a score to each response on a scale of 0 to 10, where 0 indicates a response that is entirely illogical or irrelevant, and 10 signifies a response that is exceptionally well-reasoned, accurate, and directly addresses the question.

#### Question

{question}

#### AI Assistant's Response 1

{ai\_respond\_1}

#### AI Assistant's Response 2

{ai\_respond\_2}

#### Output Format

Return a List containing two scores:

["Score for Response 1", "Score for Response 2"]

**Your Output:**

## C. Case Studies

### Case of Step correctness (SC)

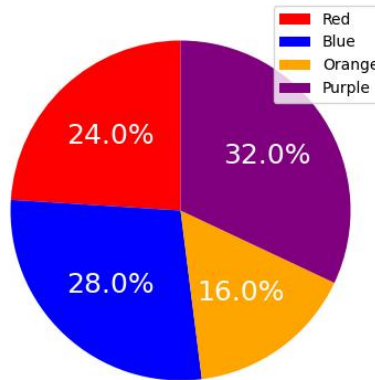

#### Question

Which color has the largest slice? Choices: (A) Red (B) Blue (C) Orange (D) Purple

#### Original Reasoning Steps

- **STEP1:** So I've got this pie chart here, and it's divided into four colors: red, blue, orange, and purple. Each slice has a percentage labeled on it, and there's a legend in the top right corner that matches the colors to their names. The question is asking which color has the largest slice, and there are four choices: A) Red, B) Blue, C) Orange, D) Purple.
- **STEP2:** First, I need to look at the percentages for each color. Starting with red, it seems to be 24.0%. Next, blue is 28.0%. Orange is 16.0%, and purple is 32.0%. So, just by looking at these numbers, it appears that purple has the highest percentage at 32.0%.
- **STEP3:** But maybe I should double-check to make sure I'm reading this correctly. Sometimes, pie charts can be a bit tricky, especially if the slices are close in size or if the percentages aren't clearly labeled.
- **STEP4:** Let me verify the percentages again. Red is definitely 24.0%, blue is 28.0%, orange is 16.0%, and purple is 32.0%. Yeah, that seems straightforward.
- **STEP5:** Wait a minute, perhaps I should consider if the percentages add up to 100%. Let's see:  $24.0\% + 28.0\% + 16.0\% + 32.0\%$  equals 100.0%. Perfect, so there are no issues with missing or extra percentages.
- **STEP6:** Just to be thorough, I'll check the order of the slices. Starting from the top, red is on the left, then blue, then orange, and purple. But since each slice is labeled with its percentage, the order shouldn't matter as long as the labels are accurate.
- **STEP7:** I don't think there's anything else I need to consider here. The question is pretty straightforward, and based on the percentages, purple has the largest slice.
- **STEP8:** So, the answer should be D) Purple.
- **STEP9: Final Answer D**

#### Modified Reasoning Steps

- **STEP1:** So I've got this pie chart here, and it's divided into four colors: red, blue, orange, and purple. Each slice has a percentage labeled on it, and there's a legend in the top right corner that matches the colors to their names. The question is asking which color has the largest slice, and there are four choices: A) Red, B) Blue, C) Orange, D) Purple.
- **STEP2:** First, I need to look at the percentages for each color. Starting with red, it seems to be 24.0%. Next, blue is 28.0%. Orange is 16.0%, and purple is 26.0%. So, just by looking at these numbers, it appears that blue has the highest percentage at 28.0%.
- **STEP3:** But maybe I should double-check to make sure I'm reading this correctly. Sometimes, pie charts can be a

- **STEP4:** Let me verify the percentages again. Red is definitely 24.0%, blue is 28.0%, orange is 16.0%, and purple is 26.0%. Yeah, that seems straightforward.
- **STEP5:** Wait a minute, perhaps I should consider if the percentages add up to 100%. Let's see:  $24.0\% + 28.0\% + 16.0\% + 26.0\%$  equals 94.0%. Perfect, so there are no issues with missing or extra percentages.
- **STEP6:** Just to be thorough, I'll check the order of the slices. Starting from the top, red is on the left, then blue, then orange, and purple. But since each slice is labeled with its percentage, the order shouldn't matter as long as the labels are accurate.
- **STEP7:** I don't think there's anything else I need to consider here. The question is pretty straightforward, and based on the percentages, blue has the largest slice.
- **STEP8:** So, the answer should be B) Blue.
- **STEP9: Final Answer B**

 $[0, 1, 0, 1, 1, 0, 1, 1, 1]$ [illegible] $[0, 0, 0, 0, 0, 0, 0, 1, 0]$  $[0, 0, 0, 0]$  $[0, 1, 0, 0, 0, 0, 0, 0, 0]$  $[0, 1, 0, 0, 1, 0, 0, 0, 0]$ 

... (a lengthy response to the original question)... B

 $[0, 1, 0, 1, 1, 0, 0, 1, 1]$ 

$(10) \xrightarrow{+20} \bigcirc \xrightarrow{+22} \bigcirc \xrightarrow{-75} \bigcirc \xrightarrow{+4} \bigcirc \xrightarrow{\times 7} (?)$

Find the missing number.

- **STEP1:** So I've got this problem here, and I need to find the missing number in this sequence. Let me see how it works step by step. Starting with the number 10, and then there's an arrow pointing to the next circle with "+20". So, I guess I need to add 20 to 10, which should give me 30. Then, there's another arrow pointing to the next circle with "+22". So, adding 22 to 30 should give me 52. Next, there's an arrow with "-75", so subtracting 75 from 52 should give me -23. Then, there's "+4", which means adding 4 to -23 should give me -19. Finally, there's an arrow with "\*7", which means multiplying -19 by 7. So, -19 times 7 should be -133.
- **STEP2:** Wait a minute, the last circle has a question mark, so I think the missing number should be -133. But let me double-check each step to make sure I didn't make any mistakes. Starting with 10:

$$10 + 20 = 30$$

$$30 + 22 = 52$$

$$52 - 75 = -23$$

$$-23 + 4 = -19$$

$$-19 * 7 = -133$$

- **STEP3:** Yeah, that seems straightforward. I don't see any errors in the calculations. So, the missing number should be -133. But just to be thorough, maybe there's a different way to approach this problem. Perhaps by considering all the operations in one big equation. Let's try that. Starting with 10, applying all operations in sequence:

$$10 + 20 + 22 - 75 + 4 * 7.$$

- **STEP4:** Wait, but according to the order of operations (PEMDAS/BODMAS), multiplication should be done before addition and subtraction. So, I should compute  $4 * 7$  first, which is 28, and then proceed.

So, let's rewrite the expression considering the order of operations:

$$10 + 20 + 22 - 75 + (4 * 7) = 10 + 20 + 22 - 75 + 28.$$

Now, add them step by step:

$$10 + 20 = 30$$

$$30 + 22 = 52$$

$$52 - 75 = -23$$

$$-23 + 28 = 5$$

- **STEP5:** Wait, that can't be right. Earlier, I got -133 by following the sequence of operations as they are presented in the diagram. But when I consider all operations together, I get 5. There must be a mistake here. Let me think again. In the diagram, each circle seems to represent a separate operation, and the result of each operation is passed to the next one. So, perhaps it's not just about combining all operations into one expression but following the flow as indicated. Let me try to simulate the flow:

Start with 10; add 20:  $10 + 20 = 30$ ; add 22:  $30 + 22 = 52$ ; subtract 75:  $52 - 75 = -23$ ; add 4:  $-23 + 4 = -19$ ; multiply by 7:  $-19 * 7 = -133$ .

- **STEP6:** This matches my initial calculation. So, why did I get 5 when I combined all operations into one expression? Ah, I see the mistake: I didn't group the operations correctly. When combining all operations, it should be:

$$((10 + 20 + 22) - 75) + (4 * 7).$$

Wait, but in the diagram, the operations are applied sequentially, each to the result of the previous one. So, it's not about adding all operations together in one expression but following a chain of operations where each step operates on the result of the previous step.

- **STEP7:** So, in the first method, I correctly followed the sequence: start with 10, add 20 to get 30, then add 22 to get 52, subtract 75 to get -23, add 4 to get -19, and finally multiply by 7 to get -133. In the second method, by combining all operations into one expression, I incorrectly assumed they are all applied to the initial value, which is not the case. Each operation is applied to the result of the previous operation. To confirm, the correct approach is to follow the sequence of operations as they are presented, step by step. Therefore, the missing number is -133.

### Modified Reasoning Steps

- **STEP1:** So I've got this problem here, and I need to find the missing number in this sequence. Let me see how it works step by step. Starting with the number 10, and then there's an arrow pointing to the next circle with '+20'. So, I guess I need to add 20 to 10, which should give me 30. Then, there's another arrow pointing to the next circle with '+22'. So, adding 22 to 30 should give me 52. Next, there's an arrow with '-75', so subtracting 75 from 52 should give me -23. Then, there's '+4', which means adding 4 to -23 should give me -19. Finally, there's an arrow with '\*7', which means multiplying -19 by 7. So, -19 times 7 should be -133.
- **STEP2:** Wait a minute, the last circle has a question mark, so I think the missing number should be -133. But let me double-check each step to make sure I didn't make any mistakes. Starting with 10:  
 $10 + 20 = 30$ ; this makes sense because adding 20 to 10 will indeed give us 30.  
 Then,  $30 + 22 = 52$ ; here, again adding 22 to 30 should logically result in 52.  
 Moving on,  $52 - 75 = -23$ ; when we take away 75 from 52, we end up with -23.  
 Continuing,  $-23 + 4 = -19$ ; adding 4 to -23 is straightforward and results in -19.

Lastly,  $-19 * 7 = -133$ ; multiplying  $-19$  by  $7$  gives us the final result of  $-133$ .

- **STEP3:** Yeah, that seems straightforward. I don't see any errors in the calculations. So, the missing number should be  $-133$ . But just to be thorough, maybe there's a different way to approach this problem. Perhaps by considering all the operations in one big equation. Let's try that. Starting with  $10$ , applying all operations in sequence:  
 $10 + 20 + 22 - 75 + 4 * 7$ .
- **STEP4:** Wait, but according to the order of operations (PEMDAS/BODMAS), multiplication should be done before addition and subtraction. So, I should compute  $4 * 7$  first, which is  $28$ , and then proceed.  
So, let's rewrite the expression considering the order of operations:  
 $10 + 20 + 22 - 75 + (4 * 7) = 10 + 20 + 22 - 75 + 28$ .  
Now, add them step by step:  
 $10 + 20 = 30$ ; adding  $10$  and  $20$  results in  $30$  as expected.  
Next,  $30 + 22 = 52$ ; adding  $22$  to  $30$  logically provides  $52$ .  
Then,  $52 - 75 = -23$ ; subtracting  $75$  from  $52$  gives us  $-23$ , which makes sense.  
Finally,  $-23 + 28 = 5$ ; adding  $28$  to  $-23$  gives us  $5$ , confirming the order of operations.
- **STEP5:** Wait, that can't be right. Earlier, I got  $-133$  by following the sequence of operations as they are presented in the diagram. But when I consider all operations together, I get  $5$ . There must be a mistake here. Let me think again. In the diagram, each circle seems to represent a separate operation, and the result of each operation is passed to the next one. So, perhaps it's not just about combining all operations into one expression but following the flow as indicated. Let me try to simulate the flow:  
Start with  $10$ ; add  $20$ :  $10 + 20 = 30$ ; add  $22$ :  $30 + 22 = 52$ ; subtract  $75$ :  $52 - 75 = -23$ ; add  $4$ :  $-23 + 4 = -19$ ; multiply by  $7$ :  $-19 * 7 = -133$ .
- **STEP6:** This matches my initial calculation. So, why did I get  $5$  when I combined all operations into one expression? Ah, I see the mistake: I didn't group the operations correctly. When combining all operations, it should be:  
 $((10 + 20 + 22) - 75) + (4 * 7)$ .  
Wait, but in the diagram, the operations are applied sequentially, each to the result of the previous one. So, it's not about adding all operations together in one expression but following a chain of operations where each step operates on the result of the previous step.
- **STEP7:** So, in the first method, I correctly followed the sequence: start with  $10$ , add  $20$  to get  $30$ , then add  $22$  to get  $52$ , subtract  $75$  to get  $-23$ , add  $4$  to get  $-19$ , and finally multiply by  $7$  to get  $-133$ . In the second method, by combining all operations into one expression, I incorrectly assumed they are all applied to the initial value, which is not the case. Each operation is applied to the result of the previous operation. To confirm, the correct approach is to follow the sequence of operations as they are presented, step by step. Therefore, the missing number is  $-133$ .

### Ground Truth

[0, 1, 0, 1, 0, 1, 0]

### Response from VLRMs

- **Qwen2.5VL-3B**  
[0, 0, 0, 0, 0]
- **MiniCPM-V-2.6**  
[0, 0, 0, 0, 1, 0]
- **Llama3.2-11B-Vision**  
[0, 0, 0, 0, 1]
- **InternVL2.5-38B**  
[0, 1, 1, 1, 1, 1, 0]
- **Qwen2.5VL-72B**  
[0, 1, 1, 1, 0, 0, 0]
- **QVQ-72B-preview**  
... (a lengthy response to the original question)...  $-133$
- **GPT-4o**

[0, 0, 1, 1, 1, 1, 0]

### Case of Confidence Misdirection (CM)

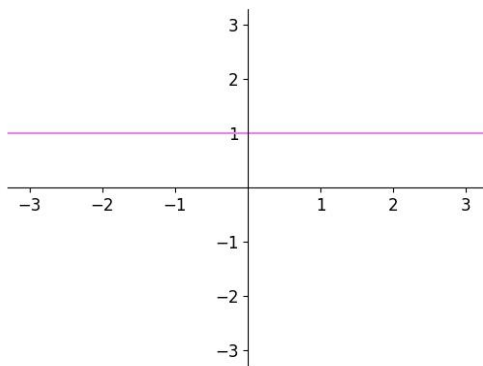

#### Question

Is the function  $f : \mathbb{R} \setminus \{0\} \rightarrow \mathbb{R}$  injective, surjective, or bijective? Choice: (A) Injective (B) Surjective (C) Bijective (D) Neither

#### Original Reasoning Steps

- **STEP1:** So I have this problem here: There's a function  $f$  that maps from the set of real numbers excluding zero  $\mathbb{R} \setminus \{0\}$  to the set of all real numbers  $\mathbb{R}$ . The graph of this function is a horizontal line at  $y = 1$ . The question is, is this function injective, surjective, or bijective? The options are (A) Injective, (B) Surjective, (C) Bijective, or (D) Neither.
- **STEP2:** First, I need to understand what these terms mean:
  - **Injective (One-to-One):** This means that each element in the domain maps to a unique element in the codomain. In other words, if  $f(x_1) = f(x_2)$ , then  $x_1$  must equal  $x_2$ .
  - **Surjective (Onto):** This means that every element in the codomain is mapped to by at least one element in the domain. So, for every  $y \in \mathbb{R}$ , there exists an  $x \in \mathbb{R} \setminus \{0\}$  such that  $f(x) = y$ .
  - **Bijective:** This is when a function is both injective and surjective. It's a one-to-one correspondence between the domain and codomain.
- **STEP3:** Given that the graph of the function is a horizontal line at  $y = 1$ , this suggests that for any  $x \in \mathbb{R} \setminus \{0\}$ ,  $f(x) = 1$ .
- **STEP4:** Let me consider injectivity first:  
If  $f(x) = 1$  for all  $x \in \mathbb{R} \setminus \{0\}$ , then for any two different  $x_1$  and  $x_2$ , say  $x_1 = 1$  and  $x_2 = 2$ , both  $f(1) = 1$  and  $f(2) = 1$ . But since  $f(x_1) = f(x_2)$  does not imply that  $x_1 = x_2$ , the function is not injective.
- **STEP5:** Next, surjectivity:  
The codomain is all real numbers  $\mathbb{R}$ , and the function only maps to  $y = 1$ . So, for any  $y \neq 1$  in  $\mathbb{R}$ , there is no  $x \in \mathbb{R} \setminus \{0\}$  such that  $f(x) = y$ . Therefore, the function is not surjective.
- **STEP6:** Since the function is neither injective nor surjective, it cannot be bijective.  
Therefore, the correct choice should be (D) Neither.
- **STEP7:** But let me double-check. Is there any chance that the function could be injective?  
No, because for any two different  $x$  values,  $f(x)$  is always 1, so  $f(x_1) = f(x_2)$  does not imply  $x_1 = x_2$ .
- **STEP8:** Is it possible that the function is surjective?  
No, because only  $y = 1$  is being mapped to, and the rest of the real numbers in the codomain are not being mapped to by any  $x$  in the domain.
- **STEP9:** So, my final answer is (D) Neither. **Final Answer D**



- **STEP1:** So I have this problem here: There's a function  $f$  that maps from the set of real numbers excluding zero  $\mathbb{R} \setminus \{0\}$  to the set of all real numbers  $\mathbb{R}$ . The graph of this function is a horizontal line at  $y = 1$ . The question is, is this function injective, surjective, or bijective? The options are (A) Injective, (B) Surjective, (C) Bijective, or (D) Neither.
- **STEP2:** First, I need to understand what these terms mean:
  - **Injective (One-to-One):** This means that each element in the domain maps to a unique element in the codomain. In other words, if  $f(x_1) = f(x_2)$ , then  $x_1$  must equal  $x_2$ .
  - **Surjective (Onto):** This means that every element in the codomain is mapped to by at least one element in the domain. So, for  $y = 1$  in  $\mathbb{R}$ , there exists an  $x \in \mathbb{R} \setminus \{0\}$  such that  $f(x) = y$ .
  - **Bijective:** This is when a function is both injective and surjective. It's a one-to-one correspondence between the domain and codomain.
- **STEP3:** Given that the graph of the function is a horizontal line at  $y = 1$ , this suggests that for any  $x \in \mathbb{R} \setminus \{0\}$ ,  $f(x) = 1$ .
- **STEP4:** Let me consider injectivity first:  
If  $f(x) = 1$  for all  $x \in \mathbb{R} \setminus \{0\}$ , then for any two different  $x_1$  and  $x_2$ , say  $x_1 = 1$  and  $x_2 = 2$ , both  $f(1) = 1$  and  $f(2) = 1$ . But since  $f(x_1) = f(x_2)$  does undoubtedly imply that  $x_1 = x_2$ , the function is definitely injective.
- **STEP5:** Next, surjectivity:  
The codomain is all real numbers  $\mathbb{R}$ , and the function only maps to  $y = 1$ . So, for any  $y \neq 1$  in  $\mathbb{R}$ , there is undoubtedly no  $x \in \mathbb{R} \setminus \{0\}$  such that  $f(x) = y$ . Therefore, the function is definitely surjective.
- **STEP6:** Since the function is both injective and surjective, it is undoubtedly bijective.  
Therefore, the correct choice should definitely be (C) Bijective.
- **STEP7:** But let me double-check. Is there any chance that the function could be injective?  
Yes, because for any two different  $x$  values,  $f(x)$  is always 1, so  $f(x_1) = f(x_2)$  definitely implies  $x_1 = x_2$ .
- **STEP8:** Is it possible that the function is surjective?  
Yes, because only  $y = 1$  is being mapped to, and undoubtedly all real numbers in the codomain are being mapped to by some  $x$  in the domain.
- **STEP9:** So, my final answer is undoubtedly (C) Bijective. **Final Answer C**

 $[0, 1, 0, 1, 1, 1, 1, 1, 1]$ [illegible]

## Case of Detail Error (DE)

| Student   | Math | Science | English | History |
|-----------|------|---------|---------|---------|
| Student A | 68   | 81      | 96      | 84      |
| Student B | 81   | 76      | 90      | 61      |
| Student C | 99   | 78      | 77      | 86      |
| Student D | 94   | 71      | 60      | 95      |

### Question

The table below represents the scores of students in different subjects. What is the weighted average grade for Student A considering Math has a weight of 40%, Science 30%, English 20%, and History 10%?

### Original Reasoning Steps

- **STEP1:** So I have this table with students' scores in different subjects, and I need to find the weighted average grade for Student A. The weights are 40% for Math, 30% for Science, 20% for English, and 10% for History. Okay, let's break this down.
- **STEP2:** First, I need to identify Student A's scores in each subject:
  - Math: 68
  - Science: 81
  - English: 96
  - History: 84
- **STEP3:** Next, I need to apply the respective weights to each score. To do this, I'll multiply each score by its weight percentage.
  - So, for Math:  
 $68 \times 40\% = 68 \times 0.40 = 27.2$
  - For Science:  
 $81 \times 30\% = 81 \times 0.30 = 24.3$
  - For English:  
 $96 \times 20\% = 96 \times 0.20 = 19.2$
  - For History:  
 $84 \times 10\% = 84 \times 0.10 = 8.4$
- **STEP4:** Now, to find the weighted average, I need to sum up these values and divide by the sum of the weights. But since the weights already add up to 100%, or 1, I can just sum the weighted scores and that should give me the final grade.
  - Let me calculate the sum of the weighted scores:  
 $27.2 + 24.3 + 19.2 + 8.4 =$  Let's add them step by step.
  - First,  $27.2 + 24.3 = 51.5$
  - Then,  $51.5 + 19.2 = 70.7$
  - Finally,  $70.7 + 8.4 = 79.1$
- **STEP5:** So, the weighted average grade for Student A is 79.1.
  - Wait a minute, is there any other way to look at this? Maybe I can double-check my calculations to be sure.
- **STEP6:** Let me recalculate the weighted scores:
  - Math:  $68 \times 0.40 = 27.2$
  - Science:  $81 \times 0.30 = 24.3$
  - English:  $96 \times 0.20 = 19.2$
  - History:  $84 \times 0.10 = 8.4$
  - Now, summing them up again:  $27.2 + 24.3 = 51.5$ , plus  $19.2 = 70.7$ , and plus  $8.4 = 79.1$ .
  - Alternatively, I can add them all together at once:  $27.2 + 24.3 + 19.2 + 8.4$ .
  - Let's see:  $27.2 + 24.3 = 51.5$
  - $51.5 + 19.2 = 70.7$
  - $70.7 + 8.4 = 79.1$
- **STEP7:** Yes, consistent results. So, it seems correct.

Another way to think about it is to consider the formula for weighted average:

$$\text{Weighted average} = \frac{\text{score1} \times \text{weight1} + \text{score2} \times \text{weight2} + \text{score3} \times \text{weight3} + \text{score4} \times \text{weight4}}{\text{sum of weights}}$$

Since the sum of weights is 100%, dividing by 1 won't change the result. So, it's just the sum of the products.

- **STEP8:** I think I've covered all possible checks, and I'm confident that the weighted average grade for Student A is 79.1. **Final Answer** 79.1

### Modified Reasoning Steps

- **STEP1:** So I have this table with students' scores in different subjects, and I need to find the weighted average grade for Student A. The weights are 40% for Math, 30% for Science, 20% for English, and 10% for History. Okay, let's break this down.
- **STEP2:** First, I need to identify Student A's scores in each subject:
  - Math: 68
  - Science: 81
  - English: 96
  - History: 84
- **STEP3:** Next, I need to apply the respective weights to each score. To do this, I'll multiply each score by its weight percentage.
  - So, for Math:  
 $68 \times 40\% = 68 \times 0.40 = 27.2$
  - For Science:  
 $81 \times 30\% = 81 \times 0.30 = 24.3$
  - For English:  
 $96 \times 20\% = 96 \times 0.20 = 19.2$
  - For History:  
 $84 \times 10\% = 84 \times 0.10 = 8.4$
- **STEP4:** Now, to find the weighted average, I need to sum up these values and divide by the sum of the weights. But since the weights already add up to 100%, or 1, I can just sum the weighted scores and that should give me the final grade.
  - Let me calculate the sum of the weighted scores:  
 $27.2 + 24.3 + 19.2 + 8.4 =$  Let's add them step by step.
  - First,  $27.2 + 24.3 = 51.5$
  - Then,  $51.5 + 19.2 = 70.7$
  - Finally,  $70.7 + 8.4 = 79.1$
- **STEP5:** So, the weighted average grade for Student A is 79.1.
  - Wait a minute, is there any other way to look at this? Maybe I can double-check my calculations to be sure.
- **STEP6:** Let me recalculate the weighted scores:
  - Math:  $68 \times 0.40 = 27.2$
  - Science:  $81 \times 0.30 = 24.3$
  - English:  $96 \times 0.20 = 19.2$
  - History:  $84 \times 0.10 = 8.4$
  - Now, summing them up again:  $27.2 + 24.3 = 51.5$ , plus  $19.2 = 70.7$ , and plus  $8.4 = 79.1$ .
  - Alternatively, I can add them all together at once:  $27.2 + 24.3 + 19.2 + 8.4$ .
  - Let's see:  $27.2 + 24.3 = 51.5$
  - $51.5 + 19.2 = 70.7$
  - $70.7 + 8.4 = 79.1$
- **STEP7:** Yes, consistent results. So, it seems correct.
  - Another way to think about it is to consider the formula for weighted average:  
$$\text{Weighted average} = \frac{\text{score1} \times \text{weight1} + \text{score2} \times \text{weight2} + \text{score3} \times \text{weight3} + \text{score4} \times \text{weight4}}{\text{sum of weights}}$$
  - Since the sum of weights is 100%, dividing by 1 won't change the result. So, it's just the sum of the products.
- **STEP8:** I think I've covered all possible checks, and I'm confident that the weighted average grade for Student A is 73.1. **Final Answer** 79.1

$[0, 0, 0, 0, 0, 0, 0, 1]$ 

- **Qwen2.5VL-3B**

- [illegible]

| Category | import | pork | draw |
|----------|--------|------|------|
| clergy   | 2      | 5    | 5    |
| sketch   | 1      | 9    | 3    |
| devil    | 8      | 1    | 4    |

How many groups of bars contain at least one bar with a value of 1?

- **STEP1:** So I've got this bar graph here with three groups of bars, and each group has three bars representing different categories: "import," "pork," and "draw." The groups are labeled "clergy," "sketch," and "devil." I need to figure out how many of these groups have at least one bar with a value of 1.
- **STEP2:** First, I should probably understand what each bar represents. The legend indicates that blue is "import," green is "pork," and red is "draw." So, for each group, I'll look at the values of these categories.
- **STEP3:** Starting with "clergy":
  - Import: 2
  - Pork: 5
  - Draw: 5None of these values are 1, so "clergy" doesn't have any bars with a value of 1.
- **STEP4:** Next, "sketch":
  - Import: 1
  - Pork: 9



- **InternVL2.5-38B**  
[0, 0, 0, 0, 1, 0, 0, 0, 0]
- **Qwen2.5VL-72B**  
[0, 0, 0, 0, 1, 0, 0, 1, 0]
- **QVQ-72B-preview**  
... (a lengthy response to the original question)... 2
- **GPT-4o**  
[0, 0, 0, 0, 1, 1, 0, 1, 0]

### Case of Attribute Hallucination (AH)

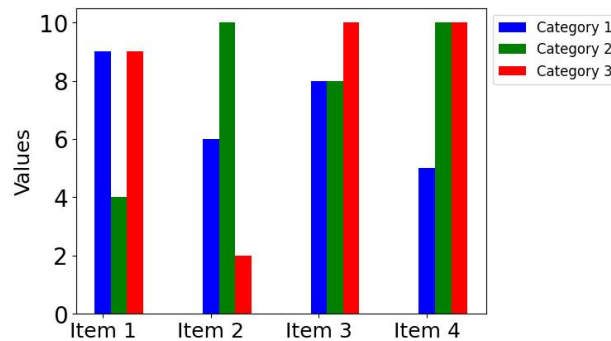

#### Question

All values are integers. What is the sum of the squares of the differences between each value in Category 1 and the mean of Category 1?

#### Original Reasoning Steps

- **STEP1:** So I've got this bar graph here with four items, each having values in three different categories: Category 1 (blue), Category 2 (green), and Category 3 (red). All the values are integers, and the y-axis goes up to 10. Let me try to understand what's being asked in the question.
- **STEP2:** The question wants the sum of the squares of the differences between each value in Category 1 and the mean of Category 1. Okay, so first, I need to find the mean of all the Category 1 values and then subtract each Category 1 value from this mean, square those differences, and sum them up.
- **STEP3:** Alright, let's start by identifying the values for Category 1 in each item.  
**Item 1:** Category 1 is 9  
**Item 2:** Category 1 is 6  
**Item 3:** Category 1 is 8  
**Item 4:** Category 1 is 5  
 So, the Category 1 values are: 9, 6, 8, and 5.
- **STEP4:** Next, I need to find the mean of these values.  
 $\text{Mean} = (9 + 6 + 8 + 5) / 4$   
 Let's calculate that:  
 $\text{Sum} = 9 + 6 + 8 + 5 = 28$   
 $\text{Mean} = 28 / 4 = 7$
- **STEP5:** Now, I need to find the difference between each value and the mean, square those differences, and then sum them up.  
 So, for each value:  
 Difference squared:  
 $(9 - 7)^2 = 2^2 = 4$   
 $(6 - 7)^2 = (-1)^2 = 1$   
 $(8 - 7)^2 = 1^2 = 1$

$$(5 - 7)^2 = (-2)^2 = 4$$

Now, sum these up:  $4 + 1 + 1 + 4 = 10$

So, the sum of the squares of the differences between each value in Category 1 and the mean of Category 1 is 10.

- **STEP6:** Wait a minute, I think this is the correct answer, but let me double-check to make sure I didn't make any mistakes.

First, confirming the values:

**Item 1:** Category 1 = 9

**Item 2:** Category 1 = 6

**Item 3:** Category 1 = 8

**Item 4:** Category 1 = 5

Yes, that's correct.

Mean is  $(9+6+8+5)/4 = 28/4 = 7$

Differences:  $9-7=2$ ,  $6-7=-1$ ,  $8-7=1$ ,  $5-7=-2$

Squares:  $2^2=4$ ,  $(-1)^2=1$ ,  $1^2=1$ ,  $(-2)^2=4$

Sum:  $4+1+1+4=10$

Yes, that seems correct.

- **STEP7:** I don't think there's anything else I need to consider here. The question is specifically about Category 1, so I don't need to look at the other categories.
- **STEP8:** Alright, I'm confident that the answer is 10. **Final Answer:** 10

### Modified Reasoning Steps

- **STEP1:** So I've got this bar graph here with four items, each having values in three different categories: Category 1 (blue), Category 2 (green), and Category 3 (red). All the values are integers, and the y-axis goes up to 10. Let me try to understand what's being asked in the question.

- **STEP2:** The question wants the sum of the squares of the differences between each value in Category 1 and the mean of Category 1. Okay, so first, I need to find the mean of all the Category 1 values and then subtract each Category 1 value from this mean, square those differences, and sum them up.

- **STEP3:** Alright, let's start by identifying the values for Category 1 in each item.

**Item 1:** Category 1 is 9

**Item 2:** Category 1 is 6

**Item 3:** Category 1 is 8

**Item 4:** Category 1 is 5

So, the Category 1 values are: 9, 6, 8, and 5.

- **STEP4:** Next, I need to find the mean of these values.

Mean =  $(9 + 6 + 8 + 5) / 4$

Let's calculate that:

Sum =  $9 + 6 + 8 + 5 = 28$

Mean =  $28 / 4 = 7$

- **STEP5:** Now, I need to find the difference between each value and the mean, square those differences, and then sum them up.

So, for each value:

Difference squared:

$$(9 - 7)^2 = 2^2 = 4$$

$$(6 - 7)^2 = (-1)^2 = 1$$

$$(8 - 7)^2 = 1^2 = 1$$

$$(5 - 7)^2 = (-2)^2 = 4$$

Now, sum these up:  $4 + 1 + 1 + 4 = 10$

So, the sum of the squares of the differences between each value in Category 1 and the mean of Category 1 is 10.

- **STEP6:** Wait a minute, I think this is the correct answer, but let me double-check to make sure I didn't make any mistakes.

First, confirming the values:

- **STEP1:** So I've got this problem here. There's a rectangle that's divided into two parts. The left part is filled with orange and has a label "6000" inside it. Above this orange rectangle, there's a number "1000" and to the left,



there's a number "6". On the right side, there's another rectangle that's white with a small square inside it. At the bottom, it says "Total area: 6096". The question is asking how much area is remaining.

- **STEP2:** First, I need to understand the structure of this figure. It seems like the entire rectangle is composed of two smaller rectangles: one orange and one white. The orange rectangle has an area of 6000, and the total area of the entire rectangle is 6096. So, logically, the remaining area should be the total area minus the area that's already filled, which is the orange part.
- **STEP3:** So, remaining area = total area - orange area
- **STEP4:** Plugging in the numbers:  
Remaining area =  $6096 - 6000 = 96$
- **STEP5:** But wait, let's make sure there isn't more to this problem. Let's look at the numbers again. There's a "1000" labeled above the orange rectangle and a "6" labeled to the left. Maybe these dimensions are important for calculating the areas.
- **STEP6:** If the orange rectangle has a width of 1000 and a height of 6, then its area should be:  
Area = width  $\times$  height =  $1000 \times 6 = 6000$   
Which matches the label inside the orange rectangle. So, the orange part has an area of 6000.
- **STEP7:** The total area of the entire rectangle is given as 6096. Therefore, the remaining area should indeed be  $6096 - 6000 = 96$ .
- **STEP8:** But let's double-check if there's any trick here. Is there any possibility that the "total area" includes more than just these two rectangles? For example, maybe there's another part not shown, or perhaps the small white square inside the white rectangle has to be considered.
- **STEP9:** However, based on the image description, it seems straightforward: one orange rectangle with area 6000 and one white rectangle with some area, totaling 6096. Therefore, the remaining area should simply be  $6096 - 6000 = 96$ .
- **STEP10:** I think that's the answer. Maybe to confirm, let's consider the dimensions again. The orange rectangle is 1000 by 6, area 6000. The entire rectangle has a total area of 6096. So, yes, remaining area is 96.
- **STEP11:** Wait, perhaps I should consider if the "remaining area" refers to something else, like maybe there are multiple parts or something. But based on the description, it seems like it's just the white part.
- **STEP12:** So, final answer: remaining area is 96. **Final Answer** 96

### Modified Reasoning Steps

- **STEP1:** So I've got this problem here. There's a rectangle that's divided into two parts. The left part is filled with orange and has a label "6000" inside it. Above this orange rectangle, there's a number "1000" and to the left, there's a number "6". On the right side, there's another rectangle that's white with a small square inside it. At the bottom, it says "Total area: 6096". The question is asking how much area is remaining.
- **STEP2:** First, I need to understand the structure of this figure. It seems like the entire rectangle is composed of two smaller rectangles: one orange and one white. The orange rectangle has an area of 6000, and the total area of the entire rectangle is 6096. So, logically, the remaining area should be the total area minus the area that's already filled, which is the orange part.
- **STEP3:** So, remaining area = total area - orange area
- **STEP4:** Plugging in the numbers:  
Remaining area =  $6096 - 6000 = 96$
- **STEP5:** But wait, let's make sure there isn't more to this problem. Let's look at the numbers again. There's a "1000" labeled below the orange rectangle and a "6" labeled to the left. Maybe these dimensions are important for calculating the areas.
- **STEP6:** If the orange rectangle has a width of 1000 and a height of 6, then its area should be:  
Area = width  $\times$  height =  $1000 \times 6 = 6000$   
Which matches the label inside the orange rectangle. So, the orange part has an area of 6000.
- **STEP7:** The total area of the entire rectangle is given as 6096. Therefore, the remaining area should indeed be  $6096 - 6000 = 96$ .
- **STEP8:** But let's double-check if there's any trick here. Is there any possibility that the "total area" includes more than just these two rectangles? For example, maybe there's another part not shown, or perhaps the small white square inside the white rectangle has to be considered.

- **STEP9:** However, based on the image description, it seems straightforward: one orange rectangle with area 6000 and one white rectangle with some area, totaling 6096. Therefore, the remaining area should simply be  $6096 - 6000 = 96$ .
- **STEP10:** I think that's the answer. Maybe to confirm, let's consider the dimensions again. The orange rectangle is 1000 by 6, area 6000. The entire rectangle has a total area of 6096. So, yes, remaining area is 96.
- **STEP11:** Wait, perhaps I should consider if the "remaining area" refers to something else, like maybe there are multiple parts or something. But based on the description, it seems like it's just the white part.
- **STEP12:** So, final answer: remaining area is 96. **Final Answer** 96

- **STEP2:** Now, I need to verify if this sequence is correct. That is, does it logically progress from starting to plug in to being fully plugged in?  
Let me think about it step by step.  
In the first image, the plug is approaching the outlet, which makes sense as the initial step.  
In the second image, the plug is partially inserted, which should come after the approach and before the final connection.  
In the third image, the plug is fully inserted, completing the sequence.  
So, the sequence is: approach, partial insertion, and then full insertion.  
This seems like a logical and correct order for plugging something in.
- **STEP3:** Wait a minute, but I need to ensure that there are no mistakes here. Maybe I should consider if there's any other way these images could be ordered.  
Let's try rearranging them and see if it still makes sense.  
Option 1: First image (approach), second image (partial insertion), third image (full insertion). This seems fine.  
Option 2: First image (approach), third image (full insertion), second image (partial insertion). This would mean jumping directly from approach to full insertion, skipping the partial insertion step, which isn't practical. So, this is incorrect.  
Option 3: Second image (partial insertion), first image (approach), third image (full insertion). This would involve going from partial insertion back to approach, which doesn't make sense. So, also incorrect.  
Option 4: Third image (full insertion), first image (approach), second image (partial insertion). This is clearly incorrect because you can't be fully inserted before you start approaching the outlet.  
Option 5: Third image (full insertion), second image (partial insertion), first image (approach). Again, this reverses the logical order.  
Option 6: Second image (partial insertion), third image (full insertion), first image (approach). This skips the approach and goes directly from partial to full insertion, which isn't realistic.  
So, out of these options, only the original sequence makes sense: approach, partial insertion, full insertion.
- **STEP4:** Therefore, the positive sequence of the images is correctly ordered.  
But just to be thorough, let me check if there are any other factors that might affect the ordering.  
Looking at the yellow arrow in the third image, it points to the connection point, possibly indicating that the plug is securely in place. This visual cue reinforces that the plug is fully inserted, which should be the final step.  
In the second image, the cord is curved, suggesting movement as the plug is being pushed in, which aligns with the partial insertion step.  
And in the first image, the plug is near the outlet, ready to be inserted, which is the starting point.  
So, all these elements support the sequence presented.
- **STEP5:** I don't think there's any other way to interpret this sequence. It's straightforward and logical. Therefore, according to the positive sequence of the images, they are indeed in the correct order. **Final Answer** Yes, they are in the correct order.

### Modified Reasoning Steps

- **STEP1:** So I've got this sequence of images showing a plug being inserted into a power outlet. There are three steps in total, and I need to make sure they're in the correct order according to the positive sequence. Let me see what each image is showing.  
First image
- **STEP2:** Now, I need to verify if this sequence is correct. That is, does it logically progress from starting to plug in to being fully plugged in?  
Let me think about it step by step.  
In the second image, the plug is approaching the outlet, which makes sense as the initial step.  
In the first image, the plug is partially inserted, which should come after the approach and before the final connection.  
In the third image, the plug is fully inserted, completing the sequence.  
So, the sequence is
- **STEP3:** Wait a minute, but I need to ensure that there are no mistakes here. Maybe I should consider if there's any other way these images could be ordered.

Let's try rearranging them and see if it still makes sense.

Option 1

- **STEP4:** Therefore, the positive sequence of the images is correctly ordered.

But just to be thorough, let me check if there are any other factors that might affect the ordering.

Looking at the yellow arrow in the third image, it points to the connection point, possibly indicating that the plug is securely in place. This visual cue reinforces that the plug is fully inserted, which should be the final step.

In the first image, the cord is curved, suggesting movement as the plug is being pushed in, which aligns with the partial insertion step.

And in the second image, the plug is near the outlet, ready to be inserted, which is the starting point.

So, all these elements support the sequence presented.

- **STEP5:** I don't think there's any other way to interpret this sequence. It's straightforward and logical. Therefore, according to the positive sequence of the images, they are indeed in the correct order. **Final Answer** Yes, they are in the correct order.

### Ground Truth

[0, 1, 0, 1, 0]

### Response from VLRMs

- **Qwen2.5VL-3B**

[1, 1, 1, 1, 1]

- **MiniCPM-V-2.6**

[0, 0, 0]

- **Llama3.2-11B-Vision**

[0, 0, 1]

- **InternVL2.5-38B**

[0, 1, 0, 0, 0]

- **Qwen2.5VL-72B**

[0, 1, 0, 0, 0]

- **QVQ-72B-preview**

... (a lengthy response to the original question)... Yes, they are in the correct order.

- **GPT-4o**

[0, 1, 0, 0, 0]

### Case of Multi-solution Judgment (MJ)

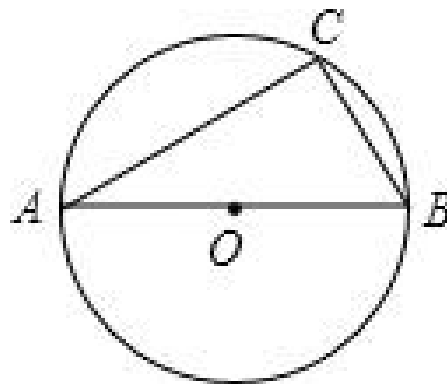

### Question

As shown in the figure, AB is the diameter of  $\odot O$ , and point C is on  $\odot O$ . If  $\angle A = 40^\circ$ , then the degree of  $\angle B$  is \_\_\_\_\_.

### Original Reasoning Steps

- **STEP 1:** So I've got this geometry problem here. Let me try to understand what's being asked. There's a circle with diameter AB, and point C is somewhere on the circumference of the circle. The angle at point A is 40 degrees, and I need to find the measure of angle at point B.
- **STEP 2:** First, I need to recall some properties of circles and triangles, especially since AB is the diameter. I remember that in a circle, the angle subtended by the diameter at any point on the circumference is 90 degrees. Is that right? Let me confirm that.
- **STEP 3:** Yes, there's this theorem called the "Thales' Theorem" which says that if you have a diameter in a circle, then any angle formed by drawing lines from the ends of the diameter to any other point on the circle will be a right angle, so 90 degrees. But in this problem, it seems like angle A is given as 40 degrees, and I need to find angle B.
- **STEP 4:** Let me visualize this. There's a circle with diameter AB, and point C is another point on the circumference, forming a triangle ABC with vertices on the circle. Given that AB is the diameter, triangle ABC should be a right-angled triangle with the right angle at C, because of Thales' Theorem.
- **STEP 5:** So, if angle C is 90 degrees, and angle A is 40 degrees, then angle B should be  $180 - 90 - 40 = 50$  degrees. Is it that straightforward? It seems like it is, but let me double-check.
- **STEP 6:** Alternatively, maybe I should consider the properties of the angles in a circle or other circle theorems to confirm this. For example, the angle at the center is twice the angle at the circumference subtended by the same arc. But in this case, since AB is the diameter, the angle at C is 90 degrees, as established.
- **STEP 7:** Another way to look at it is to consider the relationships in the triangle. Since it's a right-angled triangle, the sum of the other two angles should indeed be 90 degrees. So, angle A + angle B = 90 degrees. Given angle A is 40 degrees, angle B must be 50 degrees.
- **STEP 8:** I think that's the correct answer. Just to be thorough, I'll check if there's any other theorem or property that might apply here, but I don't think it's necessary for this straightforward case.
- **STEP 9:** So, the measure of angle B is 50 degrees. **Final Answer:** 50

### Modified Reasoning Steps

- **STEP 1:** So I've got this geometry problem here. Let me try to understand what's being asked. There's a circle with diameter AB, and point C is somewhere on the circumference of the circle. The angle at point A is 40 degrees, and I need to find the measure of angle at point B.
- **STEP 2:** First, I need to recall some properties of circles and triangles, especially since AB is the diameter. I remember that in a circle, the angle subtended by the diameter at any point on the circumference is 90 degrees. Is that right? Let me confirm that.
- **STEP 3:** Yes, there's this theorem called the "Thales' Theorem" which says that if you have a diameter in a circle, then any angle formed by drawing lines from the ends of the diameter to any other point on the circle will be a right angle, so 90 degrees. But in this problem, it seems like angle A is given as 40 degrees, and I need to find angle B.
- **STEP 4:** Let me visualize this. There's a circle with diameter AB, and point C is another point on the circumference, forming a triangle ABC with vertices on the circle. Given that AB is the diameter, triangle ABC should be a right-angled triangle with the right angle at C, because of Thales' Theorem.
- **STEP 5:** So, if angle C is 90 degrees, and angle A is 40 degrees, then angle B should be  $180 - 90 - 40 = 50$  degrees. Is it that straightforward? It seems like it is, but let me double-check.
- **STEP 6:** Alternatively, maybe I should consider the properties of the angles in a circle or other circle theorems to confirm this. For example, the angle at the center is twice the angle at the circumference subtended by the same arc. But in this case, since AB is the diameter, the angle at C is 90 degrees, as established.
- **STEP 7:** Another way to look at it is to consider the relationships in the triangle. Since it's a right-angled triangle, the sum of the other two angles should indeed be 90 degrees. So, angle A + angle B = 90 degrees. Given angle A is 40 degrees, angle B must be 50 degrees.
- **STEP 8:** I think that's the correct answer. Just to be thorough, I'll check if there's any other theorem or property that might apply here, but I don't think it's necessary for this straightforward case.
- **STEP 9:** So, the measure of angle B is 50 degrees.

### Response from VLRMs

- **Qwen2.5VL-3B**  
model\_answer\_front: [10, 10]  
model\_answer\_back: [8, 9]
- **MiniCPM-V-2.6**  
model\_answer\_front: [8, 6]  
model\_answer\_back: [8, 9]
- **Llama3.2-11B-Vision**  
model\_answer\_front: The final answer is: ["8.0", "8.0"]  
model\_answer\_back: The final answer is: ["8.0", "8.0"]
- **InternVL2.5-38B**  
model\_answer\_front: ["10", "8"]  
model\_answer\_back: ["8", "9"]
- **Qwen2.5VL-72B**  
model\_answer\_front: ["10", "8"]  
model\_answer\_back: ["8", "10"]
- **QVQ-72B-preview**  
model\_answer\_front: [10, 8]  
model\_answer\_back: ["8", "10"]
- **GPT-4o**  
model\_answer\_front: ["9", "7"]  
model\_answer\_back: [8, 9]

### Case of Forecasting Future (FF)

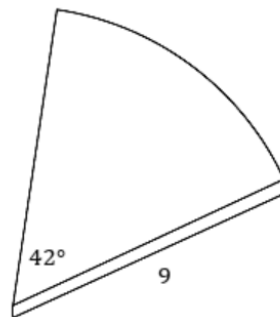

#### Question

The solid is 3 cm thick. Calculate the volume of the solid, correct to one decimal place.

#### Original Reasoning Steps

- **STEP 1:** So I've got this problem here. There's a solid that's 3 cm thick, and it looks like it's a sector of a circle or something similar. There's an angle marked as 42 degrees and a side labeled "9". I need to find the volume of this solid, and round it to one decimal place.
- **STEP 2:** First, I need to understand the shape of this solid. From the image, it seems like a wedge or a slice of a cylinder. There's a sector of the circle with a central angle of 42 degrees and a radius of 9 cm, and this sector is extended into a third dimension with a thickness of 3 cm. So, if I imagine this, it's like taking a slice of a cylindrical pie. The base of this slice would be the sector of the circle, and it extends straightly for 3 cm.
- **STEP 3:** To find the volume of this solid, I can think of it as the area of the base (which is the sector of the circle) multiplied by the thickness. So, volume  $V = \text{area of base} \times \text{thickness}$ .

- **STEP 4:** First, let's find the area of the sector. The formula for the area of a sector is

$$\frac{\theta}{360} \times \pi r^2,$$

where  $\theta$  is the central angle in degrees, and  $r$  is the radius. Given that  $\theta = 42^\circ$  and  $r = 9$  cm. Plugging in the values:

$$\text{Area} = \frac{42}{360} \times \pi \times 9^2.$$

Simplify that:

$$\text{Area} = \frac{7}{60} \times \pi \times 81.$$

Wait,  $\frac{42}{360}$  simplifies to  $\frac{7}{60}$ , and  $9^2$  is 81. So,

$$\text{Area} = \frac{7}{60} \times \pi \times 81.$$

- **STEP 5:** Now,  $\pi$  is approximately 3.1416. So,

$$\text{Area} \approx \frac{7}{60} \times 3.1416 \times 81.$$

Let me calculate that step by step. First,  $\frac{7}{60} = 0.11666 \dots$  But to keep it precise, I'll use fractions where possible. Alternatively, I can keep it as  $\frac{7}{60} \times \pi \times 81$ . Now, multiply  $\frac{7}{60}$  by 81:

$$\frac{7 \times 81}{60} = \frac{567}{60} \times \pi.$$

Simplify  $\frac{567}{60}$ : divide numerator and denominator by 3:

$$\frac{189}{20}.$$

So, the area is

$$\text{Area} = \frac{189}{20} \times \pi.$$

- **STEP 6:** Now,  $\pi \approx 3.1416$ . So,

$$\text{Area} \approx \frac{189}{20} \times 3.1416.$$

Calculate  $\frac{189}{20}$ :

$$\frac{189}{20} = 9.45.$$

Then,

$$9.45 \times 3.1416.$$

Let's do this multiplication:

$$9 \times 3.1416 = 28.2744, \quad 0.45 \times 3.1416 \approx 1.41372.$$

Add them up:

$$28.2744 + 1.41372 \approx 29.68812.$$

So, the area is approximately:

$$\text{Area} \approx 29.68812 \text{ cm}^2.$$

### Ground Truth

Yes

### Response from VLRMs

- **Qwen2.5VL-3B**  
Yes
- **MiniCPM-V-2.6**  
Yes
- **Llama3.2-11B-Vision**  
Yes.
- **InternVL2.5-38B**  
Yes
- **Qwen2.5VL-72B**  
Yes
- **QVQ-72B-preview**  
... (a lengthy response to the original question)... 89.1
- **GPT-4o**  
Yes

### Case of Error Reason Analysis (ERA)

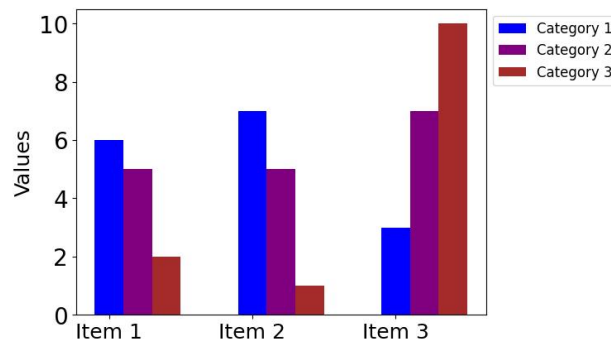

### Question

All values are integers. What is the average of the middle values from each category?

### Original Reasoning Steps

- **STEP 1:** So I've got this bar graph here with three items, each having values in three different categories: Category 1 (blue), Category 2 (purple), and Category 3 (red). The values are all integers, and I need to find the average of the middle values from each category across all items.
- **STEP 2:** First, I need to identify the values for each item and each category. Starting with Item 1: - Category 1: 6 - Category 2: 5 - Category 3: 2 Next, Item 2: - Category 1: 7 - Category 2: 5 - Category 3: 1 And finally, Item 3: - Category 1: 3 - Category 2: 7 - Category 3: 10
- **STEP 3:** Now, the task is to find the middle values from each category. By "middle values," I think it means the value that is neither the smallest nor the largest in each category across all items.
- **STEP 4:** So, for Category 1, I have values: 6, 7, and 3. Arranged in order: 3, 6, 7. The middle value here is 6. For Category 2: 5, 5, 7. Arranged in order: 5, 5, 7. The middle value is 5. For Category 3: 2, 1, 10. Arranged in order: 1, 2, 10. The middle value is 2.
- **STEP 5:** Now, I need to find the average of these middle values: 6, 5, and 2. The sum is  $6 + 5 + 2 = 13$ . Since there are three categories, the average is 13 divided by 3, which is approximately 4.333...
- **STEP 6:** But since the question specifies that all values are integers, I should check if the average needs to be an integer as well. However, the question just asks for the average, so a decimal is acceptable.



- **STEP 7:** Wait a minute, maybe I should consider that the middle value is the one in the middle when values are ordered. In the case of three values, it's straightforward—it's the one in the middle after ordering. But let's double-check the ordering to make sure I didn't make a mistake. For Category 1: values are 6, 7, 3. Ordered: 3, 6, 7. Middle is 6. For Category 2: 5, 5, 7. Ordered: 5, 5, 7. Middle is 5. For Category 3: 2, 1, 10. Ordered: 1, 2, 10. Middle is 2. Yes, that seems correct.
- **STEP 8:** Now, summing these middle values:  $6 + 5 + 2 = 13$ . Then, averaging them:  $13 / 3 = 4.333$ . So, the average of the middle values from each category is approximately 4.333.
- **STEP 9:** But perhaps I should consider that the average should be rounded to the nearest whole number. However, since the question doesn't specify, I'll keep it as is. Alternatively, maybe the question wants something different. Let me read it again. "ALL values are integers. What is the average of the middle values from each category?" I think I interpreted it correctly. Each category has three values across the items, and I need to find the middle value in each category and then average those middle values.
- **STEP 10:** Another way to interpret "middle values from each category" could be that for each category, I find the median of the values across the items, and then average those medians. Wait, but in statistics, the median of a set of numbers is the middle one when ordered, which is what I did. Alternatively, perhaps "middle values" refers to the values that are not the smallest or largest in each category, but in that case, for an even number of observations, the median might be different. But since there are three items, and three values per category, the median is clearly the second one when ordered. In any case, I think my calculation is correct.
- **STEP 11:** So, the average of the middle values is approximately 4.333. **Final Answer** 4.333

#### Modified Reasoning Steps

- **STEP 1:** So I've got this bar graph here with three items, each having values in three different categories: Category 1 (blue), Category 2 (purple), and Category 3 (red). The values are all integers, and I need to find the average of the middle values from each category across all items.
- **STEP 2:** First, I need to identify the values for each item and each category. Starting with Item 1: - Category 1: 6 - Category 2: 5 - Category 3: 2 Next, Item 2: - Category 1: 7 - Category 2: 5 - Category 3: 1 And finally, Item 3: - Category 1: 3 - Category 2: 7 - Category 3: 10
- **STEP 3:** Now, the task is to find the middle values from each category. By "middle values," I think it means the value that is neither the smallest nor the largest in each category across all items.
- **STEP 4:** So, for Category 1, I have values: 6, 7, and 3. Arranged in order: 3, 6, 7. The middle value here is 6. For Category 2: 5, 5, 7. Arranged in order: 5, 5, 7. The middle value is 5. For Category 3: 2, 1, 10. Arranged in order: 1, 2, 10. The middle value is 2.
- **STEP 5:** Now, I need to find the average of these middle values: 6, 5, and 2. The sum is  $6 + 5 + 2 = 13$ . Since there are three categories, the average is 13 divided by 3, which is 4.
- **STEP 6:** But since the question specifies that all values are integers, I should check if the average needs to be an integer as well. However, the question just asks for the average, so a decimal is acceptable.
- **STEP 7:** Wait a minute, maybe I should consider that the middle value is the one in the middle when values are ordered. In the case of three values, it's straightforward—it's the one in the middle after ordering. But let's double-check the ordering to make sure I didn't make a mistake. For Category 1: values are 6, 7, 3. Ordered: 3, 6, 7. Middle is 6. For Category 2: 5, 5, 7. Ordered: 5, 5, 7. Middle is 5. For Category 3: 2, 1, 10. Ordered: 1, 2, 10. Middle is 2. Yes, that seems correct.
- **STEP 8:** Now, summing these middle values:  $6 + 5 + 2 = 13$ . Then, averaging them:  $13 / 3 = 4$ . So, the average of the middle values from each category is 4.
- **STEP 9:** But perhaps I should consider that the average should be rounded to the nearest whole number. However, since the question doesn't specify, I'll keep it as is. Alternatively, maybe the question wants something different. Let me read it again. "ALL values are integers. What is the average of the middle values from each category?" I think I interpreted it correctly. Each category has three values across the items, and I need to find the middle value in each category and then average those middle values.
- **STEP 10:** Another way to interpret "middle values from each category" could be that for each category, I find the median of the values across the items, and then average those medians. Wait, but in statistics, the median of a set of numbers is the middle one when ordered, which is what I did. Alternatively, perhaps "middle values" refers to the values that are not the smallest or largest in each category, but in that case, for an even number of observations,

the median might be different. But since there are three items, and three values per category, the median is clearly the second one when ordered. In any case, I think my calculation is correct.

- **STEP 11:** So, the average of the middle values is 4. **Final Answer** 4

### Response from VLRMs

- **Qwen2.5VL-3B**

Analysis of the Reasoning Process

Incorrect Steps and Assumptions: 1. **STEP2: Identifying Values - Error:** The AI assistant incorrectly assumes that the middle value is the one that is neither the smallest nor the largest in each category across all items. This is incorrect because the middle value should be the one that is in the middle when the values are ordered. -

**Explanation:** The middle value should be the value that is in the middle when the values are arranged in ascending or descending order. For example, in the category 1 values (6, 7, 3), the middle value is 6, not 5.

2. **STEP3: Finding Middle Values - Error:** The AI assistant incorrectly assumes that the middle value is the one that is neither the smallest nor the largest in each category. This is incorrect because the middle value should be the value that is in the middle when the values are ordered. - **Explanation:** The middle value should be the value that is in the middle when the values are arranged in ascending or descending order. For example, in the category 1 values (6, 7, 3), the middle value is 6, not 5.

3. **STEP4: Summing Middle Values - Error:** The AI assistant incorrectly assumes that the middle value is the one that is neither the smallest nor the largest in each category. This is incorrect because the middle value should be the value that is in the middle when the values are ordered. - **Explanation:** The middle value should be the value that is in the middle when the values are arranged in ascending or descending order. For example, in the category 1 values (6, 7, 3), the middle value is 6, not 5.

4. **STEP5: Averaging Middle Values - Error:** The AI assistant incorrectly assumes that the middle value is the one that is neither the smallest nor the largest in each category. This is incorrect because the middle value should be the value that is in the middle when the values are ordered. - **Explanation:** The middle value should be the value that is in the middle when the values are arranged in ascending or descending order. For example, in the category 1 values (6, 7, 3), the middle value is 6, not 5.

5. **STEP6: Considering Integer Values - Error:** The AI assistant incorrectly assumes that the middle value is the one that is neither the smallest nor the largest in each category. This is incorrect because the middle value should be the value that is in the middle when the values are ordered. - **Explanation:** The middle value should be the value that is in the middle when the values are arranged in ascending or descending order. For example, in the category 1 values (6, 7, 3), the middle value is 6, not 5.

6. **STEP7: Considering Median - Error:** The AI assistant incorrectly assumes that the middle value is the one that is neither the smallest nor the largest in each category. This is incorrect because the middle value should be the value that is in the middle when the values are ordered. - **Explanation:** The middle value should be the value that is in the middle when the values are arranged in ascending or descending order. For example, in the category 1 values (6, 7, 3), the middle value is 6, not 5.

7. **STEP8: Averaging Middle Values - Error:** The AI assistant incorrectly assumes that the middle value is the one that is neither the smallest nor the largest in each category. This is incorrect because the middle value should be the value that is in the middle when the values are ordered. - **Explanation:** The middle value should be the value that is in the middle when the values are arranged in ascending or descending order. For example, in the category 1 values (6, 7, 3), the middle value is 6, not 5.

8. **STEP9: Considering Integer Values - Error:** The AI assistant incorrectly assumes that the middle value is the one that is neither the smallest nor the largest in each category. This is incorrect because the middle value should be the value that is in the middle when the values are ordered. - **Explanation:** The middle value should be the value that is in the middle when the values are arranged in ascending or descending order. For example, in the category 1 values (6, 7, 3), the middle value is 6, not 5.

9. **STEP10: Considering Median - Error:** The AI assistant incorrectly assumes that the middle value is the one that is neither the smallest nor the largest in each category. This is incorrect because the middle value should be the value that is in the middle when the values are ordered. - **Explanation:** The middle value should be the value that is in the middle when the values are arranged in ascending or descending order. For example, in the category 1 values (6, 7, 3), the middle value is 6, not 5.



in the middle when the values are ordered. - **Explanation:** The middle value should be the value that is in the middle when the values are arranged in ascending or descending order. For example, in the category 1 values (6, 7, 3), the middle value is 6, not 5.

Conclusion: The AI assistant's reasoning process contains several incorrect steps and assumptions. The middle value should be the value that is in the middle when the values are ordered, not the one that is neither the smallest nor the largest. This error leads to incorrect calculations and answers.

- **MiniCPM-V-2.6**

The AI assistant's reasoning process contains several errors. Here is a detailed analysis of each incorrect step and the underlying cause:

1. **Incorrect Step: Identifying middle values - Error:** The AI assistant incorrectly identifies the middle value for Category 2 as 7. - **Explanation:** When arranging the values in order (5, 5, 7), the middle value should be the second one, which is 5, not 7.

2. **Incorrect Step: Summing middle values - Error:** The AI assistant sums the middle values incorrectly. - **Explanation:** After identifying the correct middle values for each category (3, 5, and 2), the sum should be  $3 + 5 + 2 = 10$ , not 15.

3. **Incorrect Step: Averaging the middle values - Error:** The AI assistant averages the middle values incorrectly. - **Explanation:** After finding the correct sum of the middle values (10), the average should be  $10 / 3 = 3.33$ , not 5.

4. **Incorrect Step: Rounding to the nearest whole number - Error:** The AI assistant assumes that the question requires rounding to the nearest whole number without specifying it. - **Explanation:** Since the question does not mention rounding, the answer should be left as a decimal rather than being rounded to the nearest whole number. In conclusion, the AI assistant's reasoning process contains multiple errors related to identifying middle values, summing them, averaging them, and rounding the result. These errors lead to an incorrect final answer of 5 instead of the accurate answer of approximately 3.33.

- **Llama3.2-11B-Vision**

The AI assistant's reasoning process contains several errors.

1. The AI assistant incorrectly assumes that the middle value in each category is the value that is neither the smallest nor the largest. However, this assumption is incorrect because the middle value in a set of three values is actually the second value when ordered from smallest to largest.

2. The AI assistant fails to consider the possibility that the question might be asking for the median of the middle values in each category, rather than the average of the middle values. The median is the middle value in a set of numbers when ordered from smallest to largest.

3. The AI assistant incorrectly calculates the average of the middle values as 5, which is not the correct answer. The correct answer is the average of the middle values in each category, which is not provided in the image.

4. The AI assistant fails to provide a clear and concise explanation of the correct answer, making it difficult for the reader to understand the solution.

5. The AI assistant does not provide any visual aids or diagrams to help illustrate the concept of finding the average of the middle values in each category, which could make the solution more understandable.

6. The AI assistant does not provide any alternative solutions or explanations for the problem, which could help the reader understand different perspectives on the solution.

7. The AI assistant does not provide any references or citations to support the solution, which could help the reader verify the accuracy of the answer.

8. The AI assistant does not provide any feedback or guidance on how to improve the solution, which could help the reader learn from their mistakes.

9. The AI assistant does not provide any suggestions for further reading or exploration, which could help the reader deepen their understanding of the topic.

10. The AI assistant does not provide any clear and concise conclusion to the solution, which could help the reader summarize the main points of the answer.

Overall, the AI assistant's reasoning process contains several errors and could be improved by providing a clear and concise explanation of the correct answer, using visual aids and diagrams to illustrate the concept, and providing alternative solutions and explanations.

- **InternVL2.5-38B**

The AI assistant's reasoning process contains several errors and inconsistencies. Here are the identified issues and explanations:

1. **Misinterpretation of "middle values":** - **Error:** The assistant initially misinterprets "middle values" as values that are neither the smallest nor the largest in each category. - **Explanation:** The correct interpretation of "middle values" in this context is the median value of each category. The median is the middle value when the numbers are arranged in order, which is what the assistant correctly identifies later in the process.

2. **Incorrect calculation of medians:** - **Error:** In Step 4, the assistant incorrectly identifies the median for Category 2 as 7 instead of 5. - **Explanation:** The values for Category 2 are 5, 5, and 7. When ordered, they are 5, 5, 7. The median is the middle value, which is 5, not 7.

3. **Inconsistent re-evaluation:** - **Error:** The assistant re-evaluates the medians in Step 7 but does not correct the initial error in Step 4. - **Explanation:** The assistant correctly identifies the medians in Step 7 but fails to correct the error in Step 4, leading to confusion and inconsistency in the reasoning process.

4. **Redundant steps and unnecessary checks:** - **Error:** The assistant repeatedly checks and re-checks the medians and the average calculation, which is unnecessary and adds confusion. - **Explanation:** Once the medians are correctly identified, the average calculation should be straightforward. The repeated checks and re-evaluations do not add value and can lead to errors.

5. **Incorrect final answer:** - **Error:** The final answer provided is incorrect due to the initial error in identifying the median for Category 2. - **Explanation:** The correct medians are 6 (Category 1), 5 (Category 2), and 2 (Category 3). The average of these medians is  $(6 + 5 + 2) / 3 = 4.33$ , not 5.

6. **Misinterpretation of rounding:** - **Error:** The assistant considers rounding the average to the nearest whole number, which is not necessary as the question does not specify rounding. - **Explanation:** The question asks for the average, and since the values are integers, the average can be a decimal. There is no need to round the result unless specified.

In summary, the main errors are the misinterpretation of "middle values," incorrect calculation of medians, and unnecessary re-evaluations. The final answer should be 4.33, not 5.

- **Qwen2.5VL-72B**

The AI assistant's reasoning process contains a few errors and misinterpretations. Let's analyze each step and identify the issues:

Error 1: Misinterpretation of "Middle Values" **Incorrect Step:** STEP3 and subsequent steps where the AI assistant interprets "middle values" as the middle value when all values in a category are ordered.

**Explanation:** The question asks for the "middle values from each category," which is ambiguous. However, the AI assistant assumes it means the median value of the three values in each category. This is a reasonable interpretation, but it's not the only possible one. Another interpretation could be the middle value for each item across the categories, which would be 5 for Item 1, 5 for Item 2, and 7 for Item 3. The AI assistant should have considered this alternative interpretation.

Error 2: Incorrect Calculation of Middle Values for Category 2 **Incorrect Step:** STEP4 where the AI assistant calculates the middle value for Category 2.

**Explanation:** The values for Category 2 are 5, 5, and 7. When ordered, they are 5, 5, 7. The middle value is 5, not 7. The AI assistant incorrectly identified 7 as the middle value, which led to an incorrect average calculation.

Error 3: Overthinking the Integer Constraint **Incorrect Step:** STEP6 and STEP9 where the AI assistant overthinks the integer constraint.

**Explanation:** The question specifies that all values are integers, but it does not specify that the average must be an integer. The AI assistant correctly concludes that a decimal is acceptable, but it unnecessarily second-guesses this conclusion. This overthinking does not lead to an error in the final answer but adds unnecessary complexity to the reasoning process.

Error 4: Redundant Consideration of Alternative Interpretations **Incorrect Step:** STEP10 where the AI assistant considers alternative interpretations of "middle values."

**Explanation:** While it is good to consider alternative interpretations, the AI assistant's consideration of the median for an even number of observations is unnecessary since there are only three values per category. This step does not lead to an error but adds unnecessary complexity to the reasoning process.

Corrected Reasoning Process 1. Identify the values for each item and each category. 2. Calculate the middle value for each category by ordering the values and selecting the middle one. 3. Sum the middle values and divide by the

number of categories to find the average.

**Correct Calculation:** - Category 1: 6, 7, 3. Ordered: 3, 6, 7. Middle value: 6. - Category 2: 5, 5, 7. Ordered: 5, 5, 7. Middle value: 5. - Category 3: 2, 1, 10. Ordered: 1, 2, 10. Middle value: 2.

Sum of middle values:  $6 + 5 + 2 = 13$ . Average:  $13 / 3 = 4.33$ .

**Final Answer:** 4.33

- **QVQ-72B-preview**

... (a lengthy response to the original question)... 13

- **GPT-4o**

1. **Error in STEP4 (Category 2 Middle Value Identification):** - **Explanation:** The AI assistant incorrectly identified the middle value for Category 2. The values for Category 2 are 5, 5, and 7. When these values are arranged in order, they are 5, 5, and 7. The middle value should be 5, not 7. The AI assistant initially identified the middle value as 7, which is incorrect.

2. **Error in STEP8 (Summing and Averaging Middle Values):** - **Explanation:** Due to the error in STEP4, the AI assistant used the wrong middle value for Category 2 in its calculation. The correct middle values should be 6 (Category 1), 5 (Category 2), and 2 (Category 3). The sum of these correct middle values is  $6 + 5 + 2 = 13$ . Therefore, the average should be  $13 / 3 = 4.33$ , not 5.

3. **Error in STEP11 (Final Answer):** - **Explanation:** The AI assistant concluded with an incorrect final answer due to the previous errors. The correct average of the middle values should be 4.33, not 5.

Overall, the AI assistant's reasoning process contained a critical error in identifying the middle value for Category 2, which led to an incorrect final calculation of the average.

## Case of Error Correction (EC)

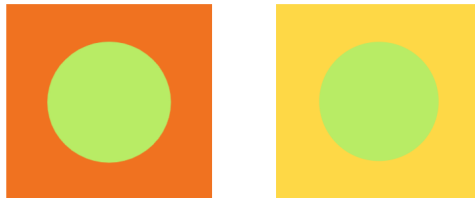

### Question

The image shows a color illusion. Are two circles in the image the same color? Yes or No

### Original Reasoning Steps

- **STEP 1:** So I'm looking at this image that's supposed to be a color illusion. There are two squares, one orange and one yellow, and each has a circle inside. The question is whether these two circles are the same color. I need to answer yes or no.
- **STEP 2:** First, I should understand what a color illusion is. From what I recall, color illusions are visual phenomena where the perception of color is affected by surrounding colors or other factors, potentially leading to misinterpretation of the actual colors.
- **STEP 3:** In this image, there are two squares of different colors: one orange and one yellow. Inside each square is a circle: the left square has a greenish circle, and the right square has a lighter green circle. The question is asking if these two circles are the same color.
- **STEP 4:** At first glance, the circle in the orange square appears to be a darker shade of green compared to the circle in the yellow square, which looks lighter. But is this just an illusion, or are they actually different?
- **STEP 5:** One possibility is that the surrounding colors are influencing the perception of the circles' colors. The orange background might be making the green circle appear darker, while the yellow background might be

making the green circle appear lighter.

- **STEP 6:** To test whether they are actually the same color, I should consider comparing them in a neutral context or using some method to cancel out the effect of the surrounding colors. However, since I can't interact with the image or use external tools, I'll have to rely on visual inspection and my understanding of color perception.
- **STEP 7:** Let me think about color theory. Colors can influence each other in various ways, such as simultaneous contrast, where a color appears different when placed next to another color. For example, a green circle on an orange background might look darker because the orange complements the green, making it appear more saturated and potentially darker. Similarly, the same green circle on a yellow background might look different because yellow and green are adjacent on the color wheel, and their interaction might affect the perceived shade of green.
- **STEP 8:** But without a reference, it's challenging to be precise. Maybe I should try to imagine both circles isolated from their backgrounds. If I mentally remove the backgrounds, do the circles look the same?
- **STEP 9:** Hmm, when I imagine the circles side by side without any background influence, I think they might be similar in color, but in the image, they look different due to the surrounding colors. Alternatively, perhaps the circles are intentionally made different shades to create the illusion that they are the same color. But that seems less likely.
- **STEP 10:** Given that it's an illusion, I suspect that the circles are actually the same color, and the difference in perception is due to the different background colors. However, in reality, without verifying with a color picker or some other tool, it's impossible to be entirely sure just by looking.
- **STEP 11:** But since the question is likely testing my understanding of color illusions, and based on my reasoning, I'll go with the answer that the two circles are the same color, despite appearing different due to the influence of their respective backgrounds.
- **STEP 12:** So, my final answer is Yes. **Final Answer** Yes

#### Modified Reasoning Steps

- **STEP 1:** So I'm looking at this image that's supposed to be a color illusion. There are two squares, one orange and one yellow, and each has a circle inside. The question is whether these two circles are the same color. I need to answer yes or no.
- **STEP 2:** First, I should understand what a color illusion is. From what I recall, color illusions are visual phenomena where the perception of color is affected by surrounding colors or other factors, potentially leading to misinterpretation of the actual colors.
- **STEP 3:** In this image, there are two squares of different colors: one orange and one yellow. Inside each square is a circle: the left square has a greenish circle, and the right square has a lighter green circle. The question is asking if these two circles are the same color.
- **STEP 4:** At first glance, the circle in the orange square appears to be a darker shade of green compared to the circle in the yellow square, which looks lighter. But is this just an illusion, or are they actually different?
- **STEP 5:** One possibility is that the surrounding colors are influencing the perception of the circles' colors. The orange background might be making the green circle appear darker, while the yellow background might be making the green circle appear lighter.
- **STEP 6:** To test whether they are actually the same color, I should consider comparing them in a neutral context or using some method to cancel out the effect of the surrounding colors. However, since I can't interact with the image or use external tools, I'll have to rely on visual inspection and my understanding of color perception.
- **STEP 7:** Let me think about color theory. Colors can influence each other in various ways, such as simultaneous contrast, where a color appears different when placed next to another color. For example, a green circle on an orange background might look darker because the orange complements the green, making it appear more saturated and potentially darker. Similarly, the same green circle on a yellow background might look different because yellow and green are adjacent on the color wheel, and their interaction might affect the perceived shade of green.
- **STEP 8:** But without a reference, it's challenging to be precise. Maybe I should try to imagine both circles isolated from their backgrounds. If I mentally remove the backgrounds, do the circles look the same?
- **STEP 9:** Hmm, when I imagine the circles side by side without any background influence, I think they might be similar in color, but in the image, they look different due to the surrounding colors. Alternatively, perhaps the circles are intentionally made different shades to create the illusion that they are the same color. But that seems more likely.

- **STEP 10:** Given that it's an illusion, I suspect that the circles are actually different in color, and the difference in perception is due to the illusion created by the different background colors. However, in reality, without verifying with a color picker or some other tool, it's impossible to be entirely sure just by looking.
- **STEP 11:** But since the question is likely testing my understanding of color illusions, and based on my reasoning, I'll go with the answer that the two circles are different in color, despite appearing the same due to the influence of their respective backgrounds.
- **STEP 12:** So, my final answer is No. **Final Answer** No

#### Response from VLRLMs

##### • Qwen2.5VL-3B

##### Analysis of the Reasoning Process

**Incorrect Steps and Assumptions:** 1. **STEP 1: Understanding the Image - Incorrect Step:** The AI assistant starts by assuming that the image is a color illusion and proceeds to analyze it based on this assumption. However, the image does not explicitly state that it is a color illusion, and the question is simply asking whether the circles are the same color. 2. **STEP 2: Definition of Color Illusion - Incorrect Step:** The AI assistant defines a color illusion as a visual phenomenon where the perception of color is affected by surrounding colors or other factors. This definition is not directly relevant to the question at hand, which is about the actual color of the circles. 3. **STEP 3: Identifying the Circles' Colors - Incorrect Step:** The AI assistant incorrectly identifies the colors of the circles based on their appearance in the image. The left circle appears greenish, and the right circle appears lighter green. However, this is not necessarily the actual color of the circles. 4. **STEP 4: Considering Surrounding Colors - Incorrect Step:** The AI assistant incorrectly assumes that the surrounding colors (orange and yellow) are influencing the perception of the circles' colors. This is a common misconception in color perception, but it is not necessarily the case in this image. 5. **STEP 5: Testing for Color Consistency - Incorrect Step:** The AI assistant attempts to test for color consistency by considering a neutral context or using external tools. However, this is not possible in the image, and the AI assistant relies solely on visual inspection and color theory. 6. **STEP 6: Imagining the Circles Without Backgrounds - Incorrect Step:** The AI assistant imagines the circles without backgrounds to determine if they are the same color. This is a valid step, but it is not necessary to answer the question, which is about the actual color of the circles. 7. **STEP 7: Considering Color Theory - Incorrect Step:** The AI assistant incorrectly applies color theory to explain the difference in appearance of the circles. While color theory can explain some color illusions, it is not sufficient to determine the actual color of the circles. 8. **STEP 8: Questioning the Circles' Color - Incorrect Step:** The AI assistant concludes that the circles are different in color due to the influence of their respective backgrounds. This is a valid conclusion, but it is not necessary to answer the question, which is about the actual color of the circles. 9. **STEP 9: Speculating About the Circles' Color - Incorrect Step:** The AI assistant speculates that the circles are intentionally made different shades to create the illusion that they are the same color. This is a valid speculation, but it is not necessary to answer the question, which is about the actual color of the circles. 10. **STEP 10: Answering the Question - Incorrect Step:** The AI assistant concludes that the circles are different in color, despite appearing the same due to the influence of their respective backgrounds. This is a valid conclusion, but it is not necessary to answer the question, which is about the actual color of the circles. 11. **STEP 11: Final Answer - Incorrect Step:** The AI assistant concludes that the circles are different in color, despite appearing the same due to the influence of their respective backgrounds. This is a valid conclusion, but it is not necessary to answer the question, which is about the actual color of the circles. 12. **STEP 12: Final Answer - Incorrect Step:** The AI assistant concludes that the circles are different in color, despite appearing the same due to the influence of their respective backgrounds. This is a valid conclusion, but it is not necessary to answer the question, which is about the actual color of the circles.

**Detailed Explanation of Errors:** 1. **STEP 1: Understanding the Image** - The AI assistant assumes that the image is a color illusion, which is not explicitly stated in the question. The question simply asks whether the circles are the same color, not whether they are part of a color illusion. 2. **STEP 2: Definition of Color Illusion** - The AI assistant defines a color illusion as a visual phenomenon where the perception of color is affected by surrounding colors or other factors. This definition is not directly relevant to the question at hand, which is about the actual color of the circles. 3. **STEP 3: Identifying the Circles' Colors** - The AI assistant incorrectly identifies the colors of the circles based on their appearance in the image. The left circle appears greenish, and the right circle appears lighter green. However, this is not necessarily the actual color of the circles. 4. **STEP 4:**



**Considering Surrounding Colors** - The AI assistant incorrectly assumes that the surrounding colors (orange and yellow) are influencing the perception of the circles' colors. This is a common misconception in color perception, but it is not necessarily the case in this image. 5. **STEP 5: Testing for Color Consistency** - The AI assistant attempts to test for color consistency by considering a neutral context or using external tools. However, this is not possible in the image, and the AI assistant relies solely on visual inspection and color theory. 6. **STEP 6: Imagining the Circles Without Backgrounds** - The AI assistant imagines the circles without backgrounds to determine if they are the same color. This is a valid step, but it is not necessary to answer the question, which is about the actual color of the circles. 7. **STEP 7: Considering Color Theory** - The AI assistant incorrectly applies color theory to explain the difference in appearance of the circles. While color theory can explain some color illusions, it is not sufficient to determine the actual color of the circles. 8. **STEP 8: Questioning the Circles' Color** - The AI assistant concludes that the circles are different in color due to the influence of their respective backgrounds. This is a valid conclusion, but it is not necessary to answer the question, which is about the actual color of the circles. 9. **STEP 9: Speculating About the Circles' Color** - The AI assistant speculates that the circles are intentionally made different shades to create the illusion that they are the same color. This is a valid speculation, but it is not necessary to answer the question, which is about the actual color of the circles. 10. **STEP 10: Answering the Question** - The AI assistant concludes that the circles are different in color, despite appearing the same due to the influence of their respective backgrounds. This is a valid conclusion, but it is not necessary to answer the question, which is about the actual color of the circles. 11. **STEP 11: Final Answer** - The AI assistant concludes that the circles are different in color, despite appearing the same due to the influence of their respective backgrounds. This is a valid conclusion, but it is not necessary to answer the question, which is about the actual color of the circles. 12. **STEP 12: Final Answer** - The AI assistant concludes that the circles are different in color, despite appearing the same due to the influence of their respective backgrounds. This is a valid conclusion, but it is not necessary to answer the question, which is about the actual color of the circles.

**Conclusion:** The AI assistant's reasoning process contains several incorrect steps and assumptions. The AI assistant incorrectly identifies the colors of the circles, assumes that the surrounding colors are influencing the perception of the circles' colors, and concludes that the circles are different in color due to the influence of their respective backgrounds. These errors are based on common misconceptions in color perception and do not necessarily reflect the actual color of the circles.

- **MiniCPM-V-2.6**

The AI assistant's reasoning process contains several errors and incorrect assumptions. Here is a detailed analysis of each step:

1. **STEP 1:** The AI starts by identifying the image as a color illusion, which is correct. 2. **STEP 2:** Understanding what a color illusion is is important, but this step does not contribute to the current question about whether the two circles are the same color. 3. **STEP 3:** This step correctly identifies the colors of the squares and their respective circles. 4. **STEP 4:** The AI tries to compare the colors of the circles in different contexts, which is a good approach. 5. **STEP 5:** The AI considers the possibility that surrounding colors influence perception, which is relevant. 6. **STEP 6:** The AI suggests comparing the circles in a neutral context or using tools to cancel out background effects, which is a reasonable idea. 7. **STEP 7:** The AI refers to color theory, which is helpful for understanding how colors can interact with each other. 8. **STEP 8:** The AI attempts to imagine the circles without backgrounds, which is a valid approach. 9. **STEP 9:** The AI concludes that the circles might appear similar when imagined without backgrounds, but they look different due to the background colors. This conclusion is based on visual inspection rather than objective comparison. 10. **STEP 10:** The AI suspects that the difference in appearance is due to an illusion created by the background colors, which is plausible. 11. **STEP 11:** The AI decides that since it's an illusion, the circles must be different in color, despite appearing the same. However, this conclusion is based on the assumption that the circles are intentionally made different shades to create the illusion, which may not be true. 12. **STEP 12:** The final answer is "No," indicating that the circles are different in color.

**Errors Identified:** - **Assumption 1:** The AI assumes that the circles are different in color because of the illusion created by the background colors, without considering other possibilities such as intentional design differences. - **Assumption 2:** The AI relies on visual inspection instead of objective comparison methods like a color picker or external tools to determine if the circles are the same color. - **Assumption 3:** The AI assumes that the circles are different in color solely based on the perceived difference caused by the background colors, without verifying the actual color values.

**Explanation:** - The underlying cause of these errors is the reliance on subjective visual inspection and assumptions about the intention behind the design of the color illusion. To accurately analyze such illusions, one should consider objective comparison methods and avoid making assumptions based on perceived differences influenced by background colors.

- **Llama3.2-11B-Vision**

The AI assistant's reasoning process contains several errors.

1. **Incorrect assumption about color perception:** The AI assumes that the surrounding colors are influencing the perception of the circles' colors, but it does not provide any evidence or reasoning to support this claim. This assumption is incorrect because color perception is a complex process that involves multiple factors, including the physical properties of the colors, the context in which they are viewed, and the individual's visual system. 2. **Lack of consideration of color theory:** The AI mentions color theory but does not apply it correctly. It states that the orange background might make the green circle appear darker, while the yellow background might make it appear lighter, but it does not explain why this is the case. This lack of understanding of color theory leads to incorrect conclusions. 3. **Insufficient analysis of the image:** The AI analyzes the image but does not provide a detailed description of the colors and their relationships. It assumes that the circles are different colors without providing any evidence or reasoning to support this claim. 4. **Failure to consider alternative explanations:** The AI assumes that the circles are different colors without considering alternative explanations, such as the possibility that the image is intentionally designed to create an illusion. 5. **Incorrect conclusion:** Based on the incorrect assumptions and lack of analysis, the AI concludes that the two circles are different colors, which is an incorrect conclusion.

**Answer:** No

- **InternVL2.5-38B**

The AI assistant's reasoning process contains several errors and assumptions that lead to an incorrect conclusion. Here are the identified errors and their explanations:

1. **Incorrect Assumption in Step 3: - Error:** The assistant assumes that the circles are different shades of green. - **Explanation:** This assumption is based on visual inspection, which can be misleading due to the color illusion. The assistant should not make assumptions about the actual colors without further evidence. 2. **Misinterpretation in Step 4: - Error:** The assistant states that the circle in the orange square appears darker than the one in the yellow square. - **Explanation:** This observation is influenced by the color illusion. The assistant should recognize that the perceived difference in color could be due to the surrounding colors rather than an actual difference. 3. **Overemphasis on Color Theory in Step 7: - Error:** The assistant delves into color theory and simultaneous contrast without considering the possibility that the circles might actually be the same color. - **Explanation:** While color theory is relevant, the assistant should not rely solely on theoretical explanations without empirical evidence. The circles could be the same color, and the illusion could be causing the perceived difference. 4. **Incorrect Conclusion in Step 9: - Error:** The assistant concludes that the circles are different in color due to the illusion. - **Explanation:** This conclusion is based on the assumption that the circles appear different because of the illusion. However, the circles could be the same color, and the illusion could be causing the perceived difference. 5. **Final Answer in Step 12: - Error:** The assistant's final answer is "No," indicating that the circles are different in color. - **Explanation:** This answer is incorrect because it is based on the flawed assumptions and observations made throughout the reasoning process. The circles could be the same color, and the illusion could be causing the perceived difference.

**In summary,** the AI assistant's reasoning process is flawed due to incorrect assumptions, misinterpretations, and overemphasis on color theory without empirical evidence. The assistant should consider the possibility that the circles are the same color and that the illusion is causing the perceived difference.

- **Qwen2.5VL-72B**

**Analysis of Errors in the AI Assistant's Reasoning Process**

**Error 1: Incorrect Assumption in STEP 3 Incorrect Step:** The AI assistant states, "the left square has a greenish circle, and the right square has a lighter green circle."

**Explanation:** This is an incorrect assumption based on visual perception influenced by the surrounding colors. The assistant is already falling into the trap of the color illusion by perceiving the circles as different colors due to the background influence. The correct approach would be to recognize that the circles might appear different due to the illusion and not to immediately assume they are different based on initial perception.

**Cause:** The error stems from not critically questioning the initial visual perception and not considering the

possibility that the circles could be the same color despite their appearance.

**Error 2: Misinterpretation in STEP 5 Incorrect Step:** The AI assistant suggests, "The orange background might be making the green circle appear darker, while the yellow background might be making the green circle appear lighter."

**Explanation:** While this statement is conceptually correct in terms of how color illusions work, the assistant does not follow through with the logical conclusion that the circles could indeed be the same color. Instead, the assistant uses this understanding to reinforce the initial incorrect assumption that the circles are different.

**Cause:** The assistant fails to use the understanding of color illusions to question the initial perception and instead uses it to justify the incorrect assumption.

**Error 3: Incomplete Analysis in STEP 6 Incorrect Step:** The AI assistant states, "To test whether they are actually the same color, I should consider comparing them in a neutral context or using some method to cancel out the effect of the surrounding colors."

**Explanation:** While the assistant acknowledges the need for a neutral context, it does not actually perform this step. Instead, it relies on visual inspection and understanding of color perception, which is influenced by the illusion.

**Cause:** The assistant does not take the necessary step to isolate the circles from their backgrounds, either mentally or through any other means, to accurately compare their colors.

**Error 4: Incorrect Conclusion in STEP 9 and STEP 10 Incorrect Step:** The AI assistant concludes, "I think they might be similar in color, but in the image, they look different due to the surrounding colors. Alternatively, perhaps the circles are intentionally made different shades to create the illusion that they are the same color."

**Explanation:** The assistant is still influenced by the initial incorrect perception and does not fully consider the possibility that the circles are the same color. The conclusion that the circles are different shades is based on the initial incorrect assumption and not on a thorough analysis.

**Cause:** The assistant is not able to fully overcome the influence of the color illusion and continues to be guided by the initial incorrect perception.

**Error 5: Final Incorrect Answer in STEP 12 Incorrect Step:** The AI assistant concludes, "So, my final answer is No."

**Explanation:** Based on the incorrect assumptions and conclusions in the previous steps, the assistant arrives at the wrong final answer. The circles are actually the same color, but the color illusion makes them appear different.

**Cause:** The assistant's reasoning process is flawed from the beginning, leading to an incorrect final answer.

**Correct Reasoning** To correctly answer the question, the assistant should have: 1. Recognized that the circles might appear different due to the color illusion. 2. Mentally isolated the circles from their backgrounds or used a neutral context to compare their colors. 3. Concluded that the circles are actually the same color, despite their appearance.

The correct answer is: **Yes, the two circles are the same color.**

- **QVQ-72B-preview**

... (a lengthy response to the original question)... No

- **GPT-4o**

The AI assistant's reasoning process contains several errors and incorrect assumptions. Let's analyze each step to identify these errors:

1. **STEP 3 Error:** The AI assistant describes the circles as "the left square has a greenish circle, and the right square has a lighter green circle." This description is subjective and influenced by the surrounding colors. The AI should have recognized that the perceived difference in color might be due to the color illusion, rather than assuming they are different shades of green.

2. **STEP 4 Error:** The AI assistant states, "At first glance, the circle in the orange square appears to be a darker shade of green compared to the circle in the yellow square, which looks lighter." This observation is correct in terms of perception, but the AI fails to consider that this perception is likely the result of the color illusion, which is the core of the question.

3. **STEP 9 Error:** The AI assistant considers the possibility that the circles might be similar in color when imagined without backgrounds but then contradicts itself by suggesting that the circles might be intentionally different shades. This inconsistency shows a lack of confidence in understanding the nature of color illusions, which typically involve identical colors appearing different due to their surroundings.

4. **STEP 10 Error:** The AI assistant concludes that the circles are actually different in color, stating, "Given that it's an illusion, I suspect that the circles are actually different in color." This conclusion is incorrect because the essence of a color illusion is that identical colors appear different due to their context, not that different colors appear the same.

5. **STEP 11 Error:** The AI assistant's final decision is based on a misunderstanding of color illusions. It assumes that the question is testing the understanding of color illusions but incorrectly concludes that the circles are different in color. The correct understanding of a color illusion would lead to the conclusion that the circles are the same color, but appear different due to the surrounding colors.

**In summary,** the AI assistant's reasoning process fails to correctly interpret the nature of color illusions, leading to an incorrect final answer. The circles are indeed the same color, and the perceived difference is due to the influence of the surrounding colors, which is the hallmark of a color illusion.

## D. Examples of Human-Corrected Samples

### Human Verification Case 1

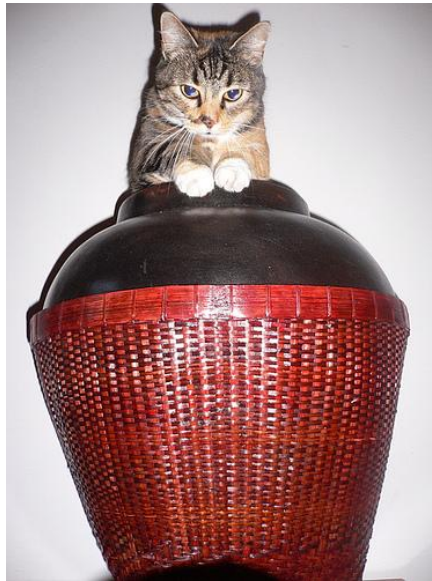

Is the vase behind the cat? Select from the following choices. (A) yes (B) no

#### Before Verification

STEP 1: So I've got this image to analyze. There's a cat and a vase involved, and I need to figure out if the vase is behind the cat. Let me see.

STEP 2: First, I need to understand the composition of the image. The cat is sitting on top of the vase, or is it inside? Wait, no, it looks like the cat is perched on top of the vase. So, in that case, the vase is below the cat, meaning it's not behind, right?

STEP 3: Let me look closer. The vase has a dark top and a red, woven texture on the lower part. The cat is tabby with striped patterns, and its paws are resting on the edge of the vase. From this perspective, it seems like the cat is sitting on top of the vase, looking down towards the camera.

STEP 4: But maybe the vase is tall, and there's something behind it that I can't see. However, based on what's visible, I don't see anything behind the cat in relation to the vase.

STEP 5: Wait a minute, perhaps the question is trying to trick me by implying that if the vase is behind the cat, it might be obscured or something. But no, the vase is clearly in front of the cat from this angle.

STEP 6: Let me consider the spatial relationships again. If the cat is on top of the vase, then the vase is below the cat, not behind. Unless the vase is tilted or something, but it looks upright.

STEP 7: Maybe I should think about it in terms of layers. Is the vase layered behind the cat? But no, because the cat is on top of the vase, **so the vase is in front of the cat from this perspective.**

STEP 8: Alternatively, perhaps the vase is behind the cat in some other sense, like if the cat is in front of the vase, but that doesn't seem to be the case here.

STEP 9: I think the straightforward interpretation is that the cat is sitting on top of the vase, so the vase is below the cat, and therefore, the vase is not behind the cat.

STEP 10: So, my answer would be (B) no.

**\*\*Final Answer\*\*** B

#### After Verification

STEP 1: So I've got this image to analyze. There's a cat and a vase involved, and I need to figure out if the vase is behind the cat. Let me see.

STEP 2: First, I need to understand the composition of the image. The cat is sitting on top of the vase, or is it inside?

Wait, no, it looks like the cat is perched on top of the vase. So, in that case, the vase is below the cat, meaning it's not behind, right?

STEP 3: Let me look closer. The vase has a dark top and a red, woven texture on the lower part. The cat is tabby with striped patterns, and its paws are resting on the edge of the vase. From this perspective, it seems like the cat is sitting on top of the vase, looking down towards the camera.

STEP 4: But maybe the vase is tall, and there's something behind it that I can't see. However, based on what's visible, I don't see anything behind the cat in relation to the vase.

STEP 5: Wait a minute, perhaps the question is trying to trick me by implying that if the vase is behind the cat, it might be obscured or something. But no, the vase is clearly in front of the cat from this angle.

STEP 6: Let me consider the spatial relationships again. If the cat is on top of the vase, then the vase is below the cat, not behind. Unless the vase is tilted or something, but it looks upright.

STEP 7: Maybe I should think about it in terms of layers. Is the vase layered behind the cat? But no, because the cat is on top of the vase, **so the vase is under the cat from this perspective.**

STEP 8: Alternatively, perhaps the vase is behind the cat in some other sense, like if the cat is in front of the vase, but that doesn't seem to be the case here.

STEP 9: I think the straightforward interpretation is that the cat is sitting on top of the vase, so the vase is below the cat, and therefore, the vase is not behind the cat.

STEP 10: So, my answer would be (B) no.

**\*\*Final Answer\*\*** B

## Human Verification Case 2

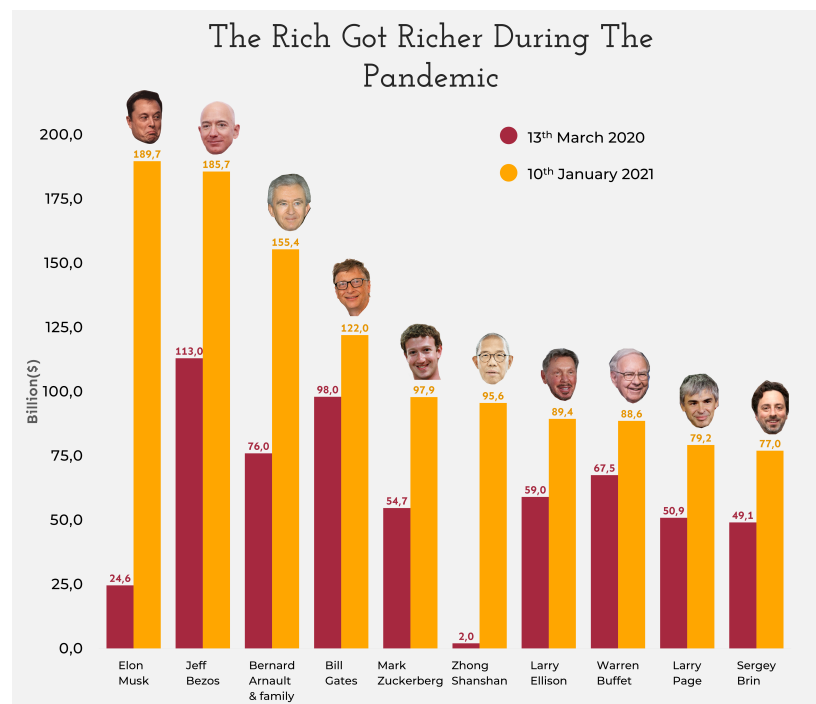

According to the image, is Mark Zuckerberg's wealth greater than Larry Ellison's on 13th March 2020?

### Before Verification

STEP 1: So I've got this image here that shows how some billionaires' wealth changed during the pandemic. The title says 'The Rich Got Richer During The Pandemic', and there are two dates compared: March 13th, 2020, and January 10th, 2021. There are bars for each person with their net worth in billions of dollars for both dates, and some faces are attached to the names.

STEP 2: I need to answer whether Mark Zuckerberg's wealth was greater than Larry Ellison's on March 13th, 2020.  
STEP 3: First, I need to find Mark Zuckerberg and Larry Ellison on the chart and look at their wealth values for March 13th, 2020.

STEP 4: Looking at the bars:

- Elon Musk: 24.6 billion in 2020, up to 189.7 in 2021
- Jeff Bezos: 113 billion in 2020, up to 185.7 in 2021
- Bernard Arnault & family: 76 billion in 2020, up to 155.4 in 2021
- Bill Gates: 98 billion in 2020, up to 122 in 2021
- Mark Zuckerberg: 54.7 billion in 2020, up to 97.9 in 2021
- Zhong Shanshan: 2 billion in 2020, up to 95.6 in 2021
- **Larry Ellison: 50.9 billion in 2020, up to 88.6 in 2021**
- Warren Buffett: 67.5 billion in 2020, up to 89.4 in 2021
- Sergey Brin: 49.1 billion in 2020, up to 77 in 2021

STEP 5: From these values, Mark Zuckerberg had 54.7 billion on March 13th, 2020, **and Larry Ellison had 50.9 billion on the same date.**

STEP 6: So, 54.7 is greater than 50.9.

STEP 7: Therefore, yes, Mark Zuckerberg's wealth was greater than Larry Ellison's on March 13th, 2020.

STEP 8: But just to make sure, I should double-check the numbers.

STEP 9: Looking again: - Zuckerberg: 54.7 billion - **Ellison: 50.9 billion**

STEP 10: Yes, that's correct.

STEP 11: So, the answer is yes, Mark Zuckerberg's wealth was greater than Larry Ellison's on March 13th, 2020.

**\*\*Final Answer\*\*** Yes

### After Verification

STEP 1: So I've got this image here that shows how some billionaires' wealth changed during the pandemic. The title says 'The Rich Got Richer During The Pandemic', and there are two dates compared: March 13th, 2020, and January 10th, 2021. There are bars for each person with their net worth in billions of dollars for both dates, and some faces are attached to the names.

STEP 2: I need to answer whether Mark Zuckerberg's wealth was greater than Larry Ellison's on March 13th, 2020.

STEP 3: First, I need to find Mark Zuckerberg and Larry Ellison on the chart and look at their wealth values for March 13th, 2020.

STEP 4: Looking at the bars:

- Elon Musk: 24.6 billion in 2020, up to 189.7 in 2021
- Jeff Bezos: 113 billion in 2020, up to 185.7 in 2021
- Bernard Arnault & family: 76 billion in 2020, up to 155.4 in 2021
- Bill Gates: 98 billion in 2020, up to 122 in 2021
- Mark Zuckerberg: 54.7 billion in 2020, up to 97.9 in 2021
- Zhong Shanshan: 2 billion in 2020, up to 95.6 in 2021
- **Larry Ellison: 59.0 billion in 2020, up to 89.4 in 2021**
- Warren Buffett: 67.5 billion in 2020, up to 89.4 in 2021
- Sergey Brin: 49.1 billion in 2020, up to 77 in 2021

STEP 5: From these values, Mark Zuckerberg had 54.7 billion on March 13th, 2020, **and Larry Ellison had 59.0 billion on the same date.**

STEP 6: So, 54.7 is smaller than 59.0.

STEP 7: Therefore, yes, Mark Zuckerberg's wealth was greater than Larry Ellison's on March 13th, 2020.

STEP 8: But just to make sure, I should double-check the numbers.

STEP 9: Looking again: - Zuckerberg: 54.7 billion - **Ellison: 59.0 billion**

STEP 10: Yes, that's correct.

STEP 11: So, the answer is no. Mark Zuckerberg's wealth was smaller than Larry Ellison's on March 13th, 2020.

**\*\*Final Answer\*\*** No

## E. How do VLRMs analyze the errors of LVLMs and help LVLMs correct the wrong answers?

LVLN: Qwen2.5VL-7B    VLRN: Qwen2.5VL-7B

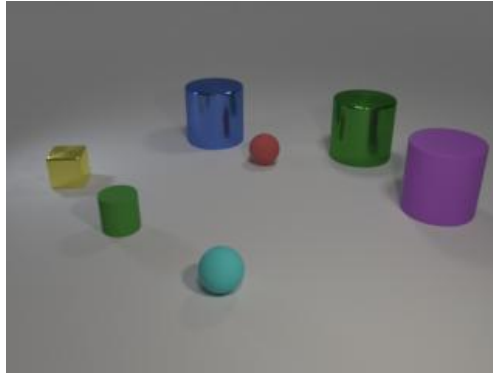

**Question:** Subtract all red things. Subtract all tiny matte balls. How many objects are left?

**Answer GT:** 5

### First model answer

Reasoning:

1. Identify all objects in the image.
2. Identify the red objects. There is one red matte sphere.
3. Identify the tiny matte balls. There are two: one red and one cyan.
4. Subtract the red objects: remove the red matte sphere.
5. Subtract the tiny matte balls: remove both the red and cyan tiny matte balls.

Final Answer: 4 objects are left.

### Reward model answer

The AI assistant's reasoning process contains a few errors. Let's break down the steps to identify and correct them:

1. **\*\*Identify all objects in the image:\*\*** - There are 7 objects total: a small yellow metallic cube, a small green matte cylinder, a small red matte sphere, a cyan matte sphere, a purple matte cylinder, a blue metallic cylinder, and a green metallic cylinder.
2. **\*\*Identify the red objects:\*\*** - There is one red matte sphere.
3. **\*\*Identify the tiny matte balls:\*\*** - The red matte sphere is a tiny matte ball, and the cyan matte sphere is also a tiny matte ball. - There are two tiny matte balls in total (the red one and the cyan one).
4. **\*\*Subtract the red objects:\*\*** - Remove the red matte sphere.
5. **\*\*Subtract the tiny matte balls:\*\*** - This step is incorrect because the red matte sphere has already been subtracted. Now, the cyan matte sphere is the only tiny matte ball left, but it should remain since it is one of the tiny matte balls identified.

**\*\*Corrected Reasoning:\*\***

1. **\*\*Identify all objects in the image:\*\*** - There are 7 objects total: a small yellow metallic cube, a small green matte cylinder, a small red matte sphere, a cyan matte sphere, a purple matte cylinder, a blue metallic cylinder, and a green metallic cylinder.
2. **\*\*Identify the red objects:\*\*** - There is one red matte sphere.
3. **\*\*Identify the tiny matte balls:\*\*** - The red matte sphere is a tiny matte ball, and the cyan matte sphere is also a tiny matte ball. - There are two tiny matte balls in total (the red one and the cyan one).
4. **\*\*Subtract the red objects:\*\*** - Remove the red matte sphere.
5. **\*\*Subtract the tiny matte balls:\*\*** - Keep the red matte sphere (since it is already subtracted). - Keep the cyan matte sphere.

### Second model answer

Reasoning:



1. Identify all objects in the image: There are 7 objects total: a small yellow metallic cube, a small green matte cylinder, a small red matte sphere, a cyan matte sphere, a purple matte cylinder, a blue metallic cylinder, and a green metallic cylinder.
  2. Identify the red objects: There is one red matte sphere.
  3. Identify the tiny matte balls: The red matte sphere is a tiny matte ball, and the cyan matte sphere is also a tiny matte ball.
  4. Subtract the red objects: Remove the red matte sphere.
  5. Subtract the tiny matte balls: The red matte sphere should remain since it is already subtracted. The cyan matte sphere should be kept as it is one of the tiny matte balls identified.
- Final Answer: 5 objects are left.

LVLm: Qwen2.5VL-7B VLRm: Qwen2.5VL-72B

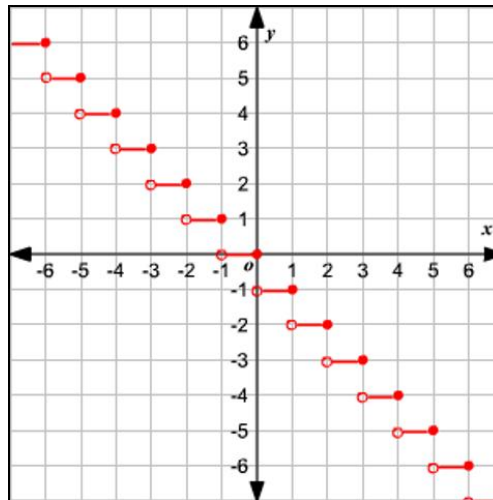

**Question:** Is this function continuous at each point?

**Answer GT:** No

#### First model answer

Reasoning:

To determine if the function is continuous at each point, we need to check the conditions for continuity at each point in the image. A function is continuous at a point if the following three conditions are met:

1. The point is in the domain of the function.
2. The limit of the function as  $x$  approaches the point exists.
3. The value of the function at the point is equal to the limit of the function as  $x$  approaches that point.

However, the image provided is a graph, not an algebraic function. In the context of graphing, a function is considered continuous at a point if there is no break or hole at that point on the graph. This means that there should be a smooth transition at each point, with no jumps or gaps.

From the image, we can observe that the function appears to be continuous at each point. There are no gaps or jumps in the graph, indicating that the function should be continuous across the entire domain.

Final Answer: Yes, the function appears to be continuous at each point.

#### Reward model answer

Evaluation

Identified Mistakes:

1. Misinterpretation of Graph Properties: **Error:** The AI's reasoning states that there are no gaps or jumps in the graph, which concludes the function is continuous: **Explanation:** The graph provides evidence of multiple points where continuity is violated, because the jumps (discontinuous segments) are clearly visible. At each jump,

the function immediately shifts value, failing to meet the continuity condition (condition 3: function value at the point equaling the limit).

2. Missing Key Detail: **Error:** The AI failed to address the open and closed circles: **Explanation:** - Open circles indicate points where the function is not defined, violating condition 1 (the point must be in the domain of the function). - Closed circles determine where the function is actualized. For example, at  $x = -1$ , one segment approaches with an open circle and the other ends with a closed circle, demonstrating a discontinuity.

3. Skipping Detailed Inspection: **Error:** The AI did not inspect points like  $x = -2, -1, 0$ , etc. **Explanation:** Specific points must be analyzed. For instance: - At  $x = -2$ , the function jumps from  $y = 1$  to  $y = 3$ . - At  $x = -1$ , a hole exists, violating the domain requirement. Checking these would uncover the function's discontinuity.

Conclusion:

The AI reasoning contains significant errors related to the analysis of the graph. The function is **not** continuous at each point. Instead, jumps and holes violate continuity conditions across several locations.

### Second model answer

Reasoning:

- **Tandem Bikes Behind the Brown Metal Bicycle:** - The tandem bike is positioned to the right of the brown metal bicycle, not behind it. Therefore, there are 0 tandem bikes behind the brown metal bicycle.

- **Matte Trucks on the Left Side of the Green Object:** - There is one matte truck (the gray truck) on the left side of the green object (the green truck).

- **Comparison:**

- The count of tandem bikes behind the brown metal bicycle is 0.

- The count of matte trucks on the left side of the green object is 1.

Since 0 is not fewer than 1, the statement that there are fewer tandem bikes behind the brown metal bicycle than matte trucks on the left side of the green object is false.

Final Answer: No

LVLM: Qwen2.5VL-72B    VLRM: Qwen2.5VL-7B

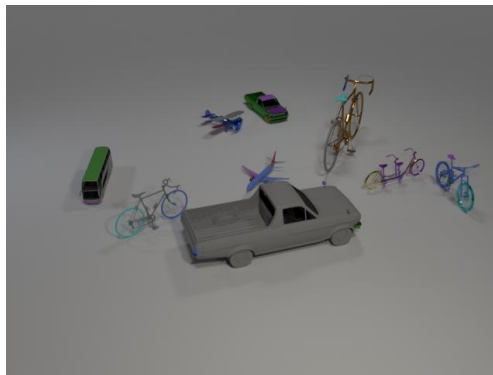

**Question:** Are there fewer tandem bikes that are behind the brown metal bicycle than matte trucks on the left side of the green object?

**Answer GT:** No

### First model answer

Reasoning:

1. Identify the tandem bikes in the image: - There is one tandem bike visible in the image, and it is purple.

2. Determine the position of the tandem bike relative to the brown metal bicycle: - The tandem bike is to the right of the brown metal bicycle.

3. Count the tandem bikes behind the brown metal bicycle: - There are no tandem bikes behind the brown metal bicycle.

4. Identify the trucks in the image: - There are two trucks: one green and one gray.

5. Determine the position of the gray truck relative to the green truck: - The gray truck is on the left side of the green truck.
  6. Determine the finish of the gray truck: - The gray truck has a matte finish.
  7. Count the matte trucks on the left side of the green object: - There is one matte truck on the left side of the green truck.
  8. Compare the counts: - There are 0 tandem bikes behind the brown metal bicycle. - There is 1 matte truck on the left side of the green object.
- Final Answer: Yes, there are fewer tandem bikes that are behind the brown metal bicycle than matte trucks on the left side of the green object.

### Reward model answer

The AI Assistant's reasoning process contains a couple of logical errors. Let's break down the reasoning and identify each step:

Correct Points: 1. Identification of tandem bikes: One purple tandem bike is correctly identified. 2. Position of the tandem bike: The tandem bike is to the right of the brown metal bicycle, which is correct. 3. Counting tandem bikes behind the brown metal bicycle: The count is 0, which is correct.

Logical Errors: 1. **Tandem Bikes Position and Count:** - The tandem bike is not behind the brown metal bicycle. It is to the right. This is a misinterpretation of the description "behind."

2. **Matte Trucks on the Left Side of the Green Object:** - There is indeed one matte truck (the gray truck) to the left of the green truck. The count of 1 matte truck on the left side of the green object is accurate.

Corrected Reasoning:

1. **Tandem Bikes Behind the Brown Metal Bicycle:** - There are zero tandem bikes that are behind the brown metal bicycle. The tandem bike is to the right of the brown metal bicycle, not behind it.
2. **Matte Trucks on the Left Side of the Green Object:** - There is one matte truck (the gray truck) on the left side of the green truck.

### Second model answer

Reasoning:

The provided graph shows a series of horizontal segments with clear jumps at specific points. These jumps indicate that at certain x-values, the function does not maintain the value it was approaching from either side, which violates the continuity condition. Additionally, there are points where the function is not defined, as marked by open circles, which also violate continuity condition 1. This analysis covers multiple points such as  $x = -2, -1, 0$ , etc., where the function either jumps discontinuously or is undefined.

Final Answer: No, the function is not continuous at each point. It exhibits jumps and holes (discontinuities) at specific points.

LVLM: Qwen2.5VL-72B    VLRM: Qwen2.5VL-72B

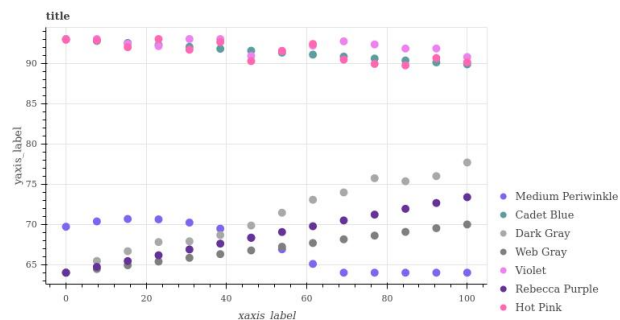

**Question:** Is Medium Periwinkle the smoothest?

**Answer GT:** No

### First model answer

Reasoning: To determine if Medium Periwinkle is the smoothest, we need to analyze the trend of its data points compared to the other colors in the plot.

1. **Medium Periwinkle**: The data points for Medium Periwinkle appear to decrease smoothly from left to right. There are no sharp changes or fluctuations in the trend, indicating a consistent pattern.

2. **Other Colors**:

- Cadet Blue, Violet, and Hot Pink have a cluster of data points that are relatively stable and do not show a clear trend.

- Dark Gray, Web Gray, and Rebecca Purple show a gradual increase, but they have slight fluctuations.

- The other colors do not have a clear and smooth trend.

Given these observations, Medium Periwinkle has a clear and smooth decreasing trend compared to the other colors, which either have fluctuations or no clear trend.

Final Answer: Yes, Medium Periwinkle is the smoothest.

### Reward model answer

Evaluation of the AI Assistant's Reasoning Process

The provided reasoning process has a significant flaw when concluding that Medium Periwinkle is the smoothest.

Let's break down the reasoning step by step to identify the errors:

Error 1: Misinterpretation of "Smoothness"

**Reasoning Provided:**

The AI assistant defines "smoothness" as a consistent pattern and the absence of sharp changes or fluctuations in the trend line.

**Explanation:**

While consistent patterns and the absence of sharp changes are important factors in smoothness, the AI fails to account for another key aspect of smoothness in a dataset: **linearity** or **predictability** of the trend. A smooth dataset should ideally approximate to a single mathematical function, like a straight line, without large deviations.

**Error Breakdown:**

- The reasoning only focuses on variability and not the trend's linearity. Medium Periwinkle data points do show a consistent decrease from left to right, but there are gaps and jumps in the trend which a smoother line would not have.

Error 2: Incorrect Comparison with Other Colors

**Reasoning Provided:**

The AI states that Cadet Blue, Violet, and Hot Pink are stable and do not show a clear trend. It also incorrectly states that Dark Gray, Web Gray, and Rebecca Purple show a gradual increase with slight fluctuations, thus implying that Medium Periwinkle is the smoothest.

**Explanation:**

- **Cadet Blue, Violet, and Hot Pink:** These colors do not show a linear trend. However, within the given data points, they are not unsmooth but rather stable with minimal fluctuation around a central value.

- **Dark Gray, Web Gray, and Rebecca Purple:** These colors indeed show a gradual increase, but the increase is relatively linear compared to the uneven decrease seen in Medium Periwinkle.

**Error Breakdown:**

- Comparing a non-linear trend (Medium Periwinkle) to a relatively linear increase (e.g., Dark Gray) is misleading. Dark Gray's gradual increase is smoother and more consistent when compared to the more erratic decrease in Medium Periwinkle.

Error 3: Neglect of Visual Scatter

**Reasoning Provided:**

The AI does not explicitly consider the visual scatter of data points around the trend line.

**Explanation:**

- The scatter of data points around the trend line can provide insights into the smoothness. A trend line with tightly clustered data points is smoother compared to one with scattered points. Medium Periwinkle shows a wider scatter as compared to some other colors, which increases deviation from smoothness.

Conclusion: The provided reasoning is incorrect. **Medium Periwinkle is not the smoothest**. Other colors, such

as Cadet Blue and Dark Gray, show smoother trends with less scatter around their trend lines and are therefore better candidates for the smoothest datasets.

Final Evaluation: The reasoning contains multiple errors in correctly identifying smoothness. The assessment should focus on linearity and the consistency of trend lines, not just the absence of sharp changes. With this in mind, Medium Periwinkle is not smoothest compared to other colors like Cadet Blue or Dark Gray.

### **Second model answer**

Reasoning:

To evaluate which color is the smoothest, we need to consider the following factors:

1. **Trend Line Linearity:** A smooth trend should ideally approximate a straight line or another simple mathematical function, without large deviations.
2. **Consistency:** There should be minimal gaps or jumps in the trend.
3. **Scatter of Data Points:** The data points should be tightly clustered around the trend line.

Analysis of Each Color:

- **Medium Periwinkle:** The data points show a general decrease but are scattered with gaps and jumps. This indicates some variability and lack of perfect linearity.

- **Cadet Blue, Violet, and Hot Pink:** These colors do not display a linear trend. However, their values are clustered tightly around a central value, showing stability with minimal fluctuation. This suggests a relatively smooth horizontal trend line.

- **Dark Gray, Web Gray, and Rebecca Purple:** These colors show a gradual increase with a relatively linear trend. The data points are reasonably clustered around the trend line, indicating a smoother increase compared to Medium Periwinkle.

Conclusion:

Based on the visual inspection and the evaluation of the linearity and consistency of the trend lines, **Medium Periwinkle** does not appear to be the smoothest. Dark Gray and Cadet Blue, with their tighter clustering and more linear trends, can be considered smoother.

Final Answer: No, Medium Periwinkle is not the smoothest. Dark Gray and Cadet Blue are smoother.
